# Supplementary material for: Heat-related respiratory hospital admissions in Europe in a changing climate: a health impact assessment
Source: PubMed Central journal article supplement — BMJ Open. 2013 Jan 24;3(1):e001842. doi: 10.1136/bmjopen-2012-001842 (PMC3563142; doi:10.1136/bmjopen-2012-001842), 2013-01-24
Supplement: bmjopen-2012-001842.draft_revisions.pdf [file bmjopen-2012-001842.draft_revisions.pdf]

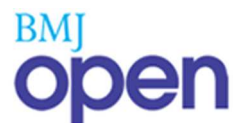

## Heat related respiratory hospital admissions in Europe in a changing climate: A health impact assessment

|                                 |                                                                                                                                                                                                                                                                                                                                                                                                               |
|---------------------------------|---------------------------------------------------------------------------------------------------------------------------------------------------------------------------------------------------------------------------------------------------------------------------------------------------------------------------------------------------------------------------------------------------------------|
| Journal:                        | <i>BMJ Open</i>                                                                                                                                                                                                                                                                                                                                                                                               |
| Manuscript ID:                  | bmjopen-2012-001842                                                                                                                                                                                                                                                                                                                                                                                           |
| Article Type:                   | Research                                                                                                                                                                                                                                                                                                                                                                                                      |
| Date Submitted by the Author:   | 24-Aug-2012                                                                                                                                                                                                                                                                                                                                                                                                   |
| Complete List of Authors:       | Åström, Christofer; Umeå University, Department of Public Health and Clinical Medicine<br>Orru, Hans<br>Rocklöv, Joacim; Umeå University, Department of Public Health and Clinical Medicine<br>Strandberg, Gustav; Swedish Meteorological and Hydrological Institute,<br>Ebi, Kristie; Stanford University, ClimAdapt<br>Forsberg, Bertil; Umeå University, Department of Public Health and Clinical Medicine |
| <b>Primary Subject Heading</b>: | Epidemiology                                                                                                                                                                                                                                                                                                                                                                                                  |
| Secondary Subject Heading:      | Epidemiology, Occupational and environmental medicine                                                                                                                                                                                                                                                                                                                                                         |
| Keywords:                       | EPIDEMIOLOGY, PUBLIC HEALTH, Epidemiology < THORACIC MEDICINE                                                                                                                                                                                                                                                                                                                                                 |
|                                 |                                                                                                                                                                                                                                                                                                                                                                                                               |

SCHOLARONE™  
Manuscripts

# Heat related respiratory hospital admissions in Europe in a changing climate

## Authors:

Christofer Åström<sup>1\*</sup>, Hans Orru<sup>1,2</sup>, Joacim Rocklöv<sup>1,3</sup>, Gustav Strandberg<sup>4</sup>, Kristie L. Ebi<sup>5</sup>, Bertil Forsberg<sup>1</sup>

## Affiliations:

<sup>1</sup> Department of Public Health and Clinical Medicine, Occupational and Environmental Medicine, Umeå University, Umeå, Sweden; <sup>2</sup> Department of Public Health, University of Tartu, Tartu, Estonia; <sup>3</sup> Department of Public Health and Clinical Medicine, Epidemiology and Global Health, Umeå University, Umeå, Sweden; <sup>4</sup> Swedish Meteorological and Hydrological Institute, Norrköping, Sweden; <sup>5</sup> ClimAdapt, Stanford University, Los Altos, California, USA

## Corresponding author:

\* Author to whom correspondence should be addressed:

Christofer Åström,

Occupational and Environmental Medicine, Department of Public Health and Clinical Medicine, Umeå University, SE 901 87, Sweden

+4690 785 0874

[christofer.astrom@envmed.umu.se](mailto:christofer.astrom@envmed.umu.se)

**Keywords:** Climate change, respiratory health, public health, heat

**Word count:** 3045

## ABSTRACT

**Objectives:** Respiratory diseases are ranked second in Europe in terms of mortality, prevalence and costs. Studies have shown that extreme heat has a large impact on mortality and morbidity, with a large relative increase for respiratory diseases. Expected increases in mean temperature and the number of extreme heat events over the coming decades due to climate change raise questions about the possible health impacts. Here we aim to assess the number of heat related respiratory hospital admissions in a future with a different climate.

**Design:** A European wide health impact assessment.

**Setting:** An assessment for each of the EU27 countries.

**Methods:** Heat-related hospital admissions under a changing climate are projected using multi-city epidemiologic exposure-response relationships applied to gridded population data and country-specific baseline respiratory hospital admission rates. Times-series of temperatures are simulated with a regional climate model based on four global climate models, under two greenhouse gas emission scenarios.

**Results:** Between a reference period (1981–2010) and a future period (2021–2050), the total number of respiratory hospital admissions attributed to heat is projected to be larger in Southern Europe, with three-times more heat attributed respiratory hospital admissions in the future period. The smallest change was estimated in Eastern Europe with about a two-fold increase. For all of Europe, the number of heat-related respiratory hospital admissions is projected to be 26,000 annually in the future period compared with 11,000 in the reference period.

**Conclusions:** The results suggest that projected effects of climate change on temperature and the number of extreme heat events could substantially influence respiratory morbidity across Europe.

**ARTICLE SUMMARY**

## Article focus

To assess how heat related respiratory hospital admissions in Europe are expected to change with the global warming in the near future.

With a range of climate change projections explore the range of the different impact estimates.

## Key messages

The 30 year annual mean increase in respiratory hospital admissions related to heat can be counted in 10's of thousands.

The increase will be different in different parts of Europe with the largest relative increase in Southern Europe.

## Strengths and limitations

The study takes the spatial variation in both climate and population density into account in the impact calculations. This makes the estimates valid for countries with large national differences in population densities and climate.

The study results exemplifies some the variation of the impacts depending on different climate change scenarios as well as the variations within one climate scenario depending on the underlying climate model.

The use of real spatial population data has limited the study to explore the change in all age respiratory hospital admissions without demographic trends. The fact that the elderly is a well-known risk group when studying heat related illness combined with the future rise of the proportion of elderly people in the population may suggest that the estimated impacts are rather conservative.

## INTRODUCTION

Respiratory diseases are ranked second in Europe in terms of mortality, prevalence and costs.<sup>1</sup> This burden is expected to increase, partly due to a changing climate.<sup>2</sup> An environmental factor with a large impact on mortality and morbidity in Europe is extreme heat, with large effects on respiratory diseases.<sup>3-5</sup> Physiological effects of exposure to heat can be directly heat related (heat stroke, heat fatigue and dehydration) or can contribute to worsening of respiratory and cardiovascular diseases, electrolyte disorders, and kidney problems.<sup>4-7</sup> A review found that heatwaves have a stronger relative impact on mortality than on emergency room visits and hospital admissions, suggesting that many individuals die before they can get to the hospital.<sup>8</sup> However, several studies confirm that heat also affects health care utilisation.<sup>3,9</sup> During the heatwave of 2003 in France, the Assistance Public Hôpitaux de Paris recorded 2,400 additional visits to the emergency care units and 1,900 additional hospital admissions.<sup>10</sup> During the heatwave in California in 2006 there were almost 1,200 hospital admissions together with more than 16,000 visits to the emergency departments.<sup>6</sup>

It is possible that hospital admissions could increase in the future due to temperature changes projected with climate change, assuming no additional acclimatisation. Projected changes include an increase in global mean temperature of 1.8°C to 4.0°C by the end of this century, with larger increases over land areas at high latitudes, changing seasonal temperatures, and increases in the frequency, intensity, duration, and spatial extent of heatwaves.<sup>11</sup> Recent projections for 2070–2100 suggest that maximum temperatures experienced once every 20 years during the period 1961–1990 could be expected as often as every year in southern Europe and every 3rd-5th year in northern Europe.<sup>12</sup> This means that Europe should expect an increase in both mean temperatures and the number of extreme heat events. Recent heatwaves are consistent with projections. For example, the heatwave that occurred in Europe 2003 could be expected to return every 46,000 years, based on the temperature distribution for the years 1864–2000.<sup>13</sup> However, such extreme hot conditions may become normal in the end of this century due to anthropogenic climate changes.<sup>14</sup> The uncertainty in

1  
2  
3 this estimated return time is quite high, with a lower bound of the 90% confidence interval of 9,000  
4  
5 years. Even so, another heatwave occurred in 2006 with the most anomalous July temperature ever  
6  
7 measured in Europe.<sup>15</sup> In 2010, Eastern Europe experienced a heatwave with summer temperatures  
8  
9 higher than the last 140 years, resulting in roughly 55,000 excess deaths in Russia.<sup>16</sup>  
10

11  
12 The possible impacts of these changes in morbidity, particularly respiratory health, are relatively  
13  
14 unexplored.  
15

## 16 17 18 **Aim**

19 The aim of this study is to assess the extent to which climate change could affect heat related  
20  
21 respiratory hospital admissions (RHAs) in Europe. Using a range of climate projections, we estimate  
22  
23 the change in hospital admissions between a reference period and a future period.  
24  
25  
26  
27  
28

## 29 **METHODS**

### 30 31 32 **Climate change and temperature modelling**

33 The Rossby Centre regional atmospheric climate model RCA3<sup>17</sup> was developed by SMHI (Swedish  
34  
35 meteorological and hydrological institute) to dynamically downscale results from the global climate  
36  
37 models CCSM3<sup>18</sup>, ECHAM5<sup>19</sup>, HadleyCM3<sup>20</sup> and ECHAM4<sup>21</sup> to a higher resolution over Europe. RCA3 is  
38  
39 run on a horizontal grid spacing of 0.44° (corresponding to approximately 50 km) and a time step of  
40  
41 30 minutes. Projections are based on the global greenhouse gas emission scenarios A1B and A2  
42  
43 (scenarios are described in detail in the SRES<sup>22</sup>). Both have been used in climate change health  
44  
45 impact assessments (HIA).<sup>23-26</sup> A1B is a “middle of the road” scenario and A2 is considered a high  
46  
47 emission scenario, although recent greenhouse gas emissions have been higher. Data from one  
48  
49 climate model, under one climate change scenario, is referred to as one climate change projection.  
50  
51  
52

53  
54 We use aggregated daily projections of maximum temperature and relative humidity data to  
55  
56 estimate exposure for the periods 1981–2021 (reference period) and 2021–2050 (future period).  
57  
58  
59  
60

## Population and morbidity rates

The annual country specific rate of respiratory hospital admissions between 2005 and 2010 were extracted from the WHO's European Health for All Database (<http://data.euro.who.int/hfad>) for the EU27 countries. The mean value over the six years was used as a baseline morbidity rate. Official population data were from the HYDE theme within the Netherlands Environmental Assessment Agency.<sup>27</sup> These data are gridded on a 0.0833° resolution (approximately 9,45km) and matched with the climatic data by summing the population within each climatic grid cell.

## Exposure-response assumption

The impact calculations were based on the heat morbidity relationship estimated within the European PHEWE project.<sup>3</sup> This relationship was based on analyses of 12 European cities over the 1990s, using the daily maximum of apparent temperature (AT), where AT is a combination of the measured temperature and the dew point temperature:

$$AT = -2.653 + 0.944 * T + 0.0153 * (DT)^2$$

where T is the air temperature and DP the dew point temperature, which can be derived from temperature and relative humidity.<sup>28</sup> The AT accounts for heat stress related not only to the absolute temperature but also to the saturation of the surrounding air that makes it harder to regulate body temperature by sweating, the most important mechanism to maintain a healthy body temperature.<sup>29</sup>

<sup>30</sup> The PHEWE study used a 0–3 day lag of the maximum AT and concluded that the 90th percentile of this exposure variable for the summer months, April to September, is the appropriate threshold value for the heat morbidity function.<sup>3</sup> We calculated the 90th percentile for the summer months for each grid cell from the climate data for the 1990s yielding individual thresholds for each grid cell for each climate projection.

The PHEWE study calculated the relative risk (RR) coefficients for each of the 12 cities and then combined into two meta-coefficients for North-Continental cities 1.012 (95% CI 1.001–1.022) and

1  
2  
3 Mediterranean cities 1.021 (95% CI 1.006–1.036), associated with a 1-degree increase above the  
4  
5 temperature threshold. Meta-coefficients were more suitable as they allowed calculation of the  
6  
7 change in RHAs for countries with and without a city in the PHEWE Study. We assigned the  
8  
9 Mediterranean coefficient to Portugal and the Mediterranean countries. The rest of Europe was  
10  
11 assigned the RR for the North continental cities. Because the population data were not stratified by  
12  
13 age, we used the PHEWE study coefficients for all ages.  
14  
15

## 16 17 Projections

18  
19 The final data used in the impact calculations were based on the climate data grid with a resolution  
20  
21 of 0.44° resulting in 8,075 grid cells over Europe. The population data, RR coefficients and baseline  
22  
23 morbidity rates were projected for each grid cell. In addition, the countries within EU27 were  
24  
25 grouped into four regions, Northern, Western, Eastern and Southern Europe, according to the United  
26  
27 Nations classification scheme (<http://unstats.un.org/unsd/methods/m49/m49regin.htm#europe>).  
28  
29

30  
31 Thus, each grid cell includes (1) a daily time-series of 0–3 day lag maximum AT for each climate  
32  
33 change projection; (2) a grid cell specific temperature morbidity threshold and a location-based RR  
34  
35 coefficient; and (3) population. For each grid cell, the AT was compared to the specific threshold for  
36  
37 each day in the two time periods and risk estimates were calculated for each day. The expected  
38  
39 number of daily RHAs in each cell was calculated using the population and the expected daily number  
40  
41 of RHAs per capita, based on the national average of the grid cell.  
42  
43

$$44 \quad RHA_{i,t} = RR_i^{(AT_{i,t} - Thres)_+} * Pop_i * RHAp_c_i$$

45  
46  
47 where  $RHA_{i,t}$  is the number of RHAs attributable to heat in grid cell  $i$  at time  $t$ ,  $RR_i$  the RR coefficient in  
48  
49 grid cell  $i$ ,  $(AT_{i,t} - Thres)_+$  the positive difference between the 0–3 lag AT and the threshold for grid cell  
50  
51  $i$  at time  $t$ ,  $Pop_i$  and  $RHAp_c_i$  the population and expected number RHAs per capita in grid cell  $i$ .  
52  
53  
54

55  
56 For each country, the estimated number of RHAs attributed to heat was calculated for each climate  
57  
58 change projection, for both the reference and the future period. The estimated number of RHAs  
59  
60



1  
2  
3 attributed to heat was then transformed into the proportion of the expected annual number RHAs  
4  
5 for each country (data available from the authors). Mean estimates were calculated for each region  
6  
7 for each climate change projection.  
8  
9

## 10 11 **Sensitivity analysis**

12 Because the study results could heavily depend on the RR coefficients and thresholds used, we assess  
13 whether the estimates appeared sensitive to the region-specific meta-coefficients. We investigated  
14 the grids that contained the cities in the PHEWE study using both the location (Mediterranean or  
15 North-Continental) and city specific RR coefficients.<sup>3</sup> We then compared the results with respect to  
16  
17 the attributed proportion of RHAs and the proportional change in heat related RHAs.  
18  
19  
20  
21  
22  
23  
24  
25

## 26 27 **RESULTS**

28 The periods of warm days will increase in the future. For the cities included in the sensitivity analysis,  
29 the temperature threshold was exceeded by 20 days in the baseline period and 40 days in the future  
30 period, on average each year.  
31  
32  
33  
34

35 In the future period approximately 0.4% of the annual numbers of RHAs in Europe was estimated to  
36 be due to heat (Table 1), based on the mean estimates over the climate change projections. In  
37 absolute terms, assuming all else equal, this represents about 26,000 cases annually in Europe. This  
38 should be compared to the reference period where approximately 0.18% of all RHAs were attributed  
39 to heat or about 11,000 cases annually. Thus, the results suggest more than a relative doubling of the  
40  
41  
42  
43  
44  
45  
46 RHAs attributed to heat in Europe.  
47  
48  
49  
50  
51  
52  
53  
54  
55  
56  
57  
58  
59  
60

**Table 1.** The estimated proportion of RHAs attributed to heat for each region. Intervals describe the highest and lowest estimate in each region

| Region          | 1981–2010             | 2021–2050             | Change                |
|-----------------|-----------------------|-----------------------|-----------------------|
| Eastern Europe  | 0.17% (0.16% – 0.19%) | 0.31% (0.29% – 0.35%) | 0.14% (0.11% – 0.17%) |
| Northern Europe | 0.13% (0.10% – 0.15%) | 0.27% (0.19% – 0.32%) | 0.14% (0.07% – 0.17%) |
| Southern Europe | 0.23% (0.18% – 0.26%) | 0.64% (0.42% – 0.68%) | 0.41% (0.23% – 0.44%) |
| Western Europe  | 0.18% (0.16% – 0.20%) | 0.39% (0.34% – 0.45%) | 0.21% (0.17% – 0.26%) |
| EU27            | 0.18% (0.10% – 0.26%) | 0.40% (0.19% – 0.68%) | 0.21% (0.07% – 0.44%) |

On the regional level, the five projections estimate increases in the number of heat related RHAs for Europe (Table 2). However, in one climate change projection, The Czech Republic, Hungary, Poland and Slovakia were estimated to have a decrease in heat related RHAs (Fig 1). The countries with the highest estimated increase also show the largest range between the highest and lowest estimate. The Scandinavian and Baltic countries show the smallest range between the highest and lowest estimates along with small increases of the mean estimates.

**Table 2.** Future increase in heat related RHAs based on the four climate models, under two emission scenarios, as the proportion of the annual expected number of RHAs in each region

| Global climate model    | CCSM3 | ECHAM5 | HadCM3 | ECHAM4 | ECHAM5 |
|-------------------------|-------|--------|--------|--------|--------|
| Greenhouse gas scenario | A1B   |        | A2     |        |        |
| Eastern Europe          | 0.32% | 0.08%  | 0.18%  | 0.12%  | 0.01%  |
| Northern Europe         | 0.17% | 0.09%  | 0.14%  | 0.20%  | 0.08%  |
| Southern Europe         | 0.51% | 0.29%  | 0.64%  | 0.45%  | 0.14%  |
| Western Europe          | 0.30% | 0.11%  | 0.26%  | 0.29%  | 0.06%  |
| EU27                    | 0.32% | 0.13%  | 0.29%  | 0.26%  | 0.07%  |

There is variation among countries, with the largest increases in the Southern European countries and the smallest increase in Eastern Europe (Table 2). The relative change in the burden of RHA's in relation to the climate change scenarios investigated indicate a larger relative increase in

1  
2  
3 Mediterranean countries (approximately three times) compared to Northern European countries  
4  
5 (approximately two times).  
6  
7

## 8 9 **Sensitivity analysis**

10 The calculations using the city specific RR coefficients yielded a different proportion and number of  
11  
12 estimated RHAs than the ones using the two meta-coefficients, as expected. The relative changes in  
13  
14 the number of hospital admissions attributed to heat between the two time-periods were not  
15  
16 affected by the change of the RR coefficients.  
17  
18  
19

## 20 21 **DISCUSSION**

22 The analysis estimates that the number of RHAs will increase in a warmer climate with more hot  
23  
24 days. Heat related RHAs were projected to increase two- to three-fold in the future due to climate  
25  
26 change. However, the proportion of respiratory admissions attributed to heat would remain rather  
27  
28 small. As most heat related health outcomes occur during the warmest period of the year, presenting  
29  
30 the increase as a change in the proportion of the total number of annual RHAs can underestimate the  
31  
32 additional burden on the health care system during summer. As the threshold was exceeded for  
33  
34 approximately 40 days in one year, an annual increase of 0.21% would result in a 1.9% increase on  
35  
36 average during these 40 days. The annual numbers are used because the available baseline rates of  
37  
38 RHAs are expressed as an annual average. Applying results to sub-national scales could be  
39  
40 inappropriate because national averages summarize over considerable heterogeneity.  
41  
42  
43  
44  
45

46 The results suggest a larger impact from heat in Southern Europe in the future period, centred on  
47  
48 year 2035, than in the eastern and northern parts. This is in line with many climate change  
49  
50 projections showing a larger relative increase in the number of extremely hot days in southern  
51  
52 Europe compared with northern Europe.<sup>12</sup> However, to some extent this might also be explained by  
53  
54 model bias for northern Europe introduced by the RCA3 model, where the model appears to  
55  
56 underestimate temperature for the warmest days.<sup>17</sup> This temperature bias is present in the reference  
57  
58  
59  
60

1  
2  
3 period, future period, and threshold values; therefore, the estimated numbers of RHAs from the two  
4  
5 periods within each scenario are comparable, but comparisons within the same time-period, across  
6  
7 scenarios may be inaccurate.  
8  
9

10  
11 As the estimates are based on the population size in each grid cell, the added burden will be larger in  
12  
13 countries with larger increases in temperatures in densely populated areas. Because the population  
14  
15 of a city is considered a good predictor of the size of the urban heat island,<sup>31</sup> an increase in the  
16  
17 population living in urban will increase the numbers exposed and the temperature to which they are  
18  
19 exposed. Heat islands increase temperatures in urbanized areas compared to surrounding areas, also  
20  
21 reducing cooling during the night time.<sup>32</sup> These factors combined are likely to magnify the health  
22  
23 burden during a heatwave.<sup>33</sup> The coarse spatial scale of the climate models makes them unable to  
24  
25 take the urban heat island effect into account. Together with the urbanization of Europe, this could  
26  
27 potentially result in underestimation of actual consequences/RHAs in the future period because the  
28  
29 same population size and composition were assumed in both periods. In addition, climate change is  
30  
31 likely to increase ozone concentrations that would add an additional health burden to people at risk  
32  
33 of respiratory diseases. The number of deaths and RHAs, due to a change in ozone, is expected to  
34  
35 change in the future.<sup>34</sup>  
36  
37  
38

39  
40 We used the same thresholds for the reference and future period to isolate the effect of climate  
41  
42 change. This would tend to overestimate the increased impact because there will undoubtedly be  
43  
44 biological and/or social adaptations that will reduce future health temperature-related burdens.  
45  
46 However, given the uncertainty of such adaptation effects, we choose to not incorporate such effects  
47  
48 in the projections. Studies from the U.S show that the heat related health burdens decreased over  
49  
50 the last 50 years,<sup>35</sup> indicating that some adaptation is taking place. An opposite trend appears to be  
51  
52 occurring in Stockholm, with an increase of the risk of mortality associated with heat during the  
53  
54 1990s.<sup>36</sup> The magnitude and the extent of future adaptation is, of course, highly uncertain, and will  
55  
56 vary between and within countries. Nevertheless, cities with higher thresholds seem to have higher  
57  
58  
59  
60

1  
2  
3 risk ratio coefficients.<sup>3 37</sup> In an effort to estimate future and presumably higher thresholds, one must  
4  
5 also adjust the risk ratio coefficients. This would result in fewer days of elevated risk, but the risk  
6  
7 increase on each occasion could be higher due to the higher RRs.  
8  
9

10  
11 Table 1 shows how the results vary by global climate models and greenhouse gas scenarios. This  
12  
13 study exemplifies the magnitude of the difference between projections made by a model with  
14  
15 different initial conditions and between different models with the same initial conditions. The results  
16  
17 indicate the range of these estimates is large. The mean increase over the five projections however,  
18  
19 provides confidence that the number of RHAs will increase over Europe as the climate continues to  
20  
21 change.  
22  
23

24  
25 To improve the estimates of the impacts of heat of RHAs, detailed data on emergency room visits  
26  
27 and admissions during summer are needed, such as the proportion of emergency department cases  
28  
29 admitted to hospital, and the fatality rate. A better understanding of vulnerable groups is needed,  
30  
31 including how these groups could change over time. For example, the portion of the population aged  
32  
33 over 65 will increase from 17 to 29%<sup>38</sup> by 2050, significantly increasing the size of this vulnerable  
34  
35 group.  
36  
37

38  
39 Normal weather patterns in the future will be different than those of today, both for average  
40  
41 temperature and extreme weather events. As the number of heat related RHAs are expected to  
42  
43 increase on the sub-continental scale, additional national or regional projections of the future health  
44  
45 burden from heat are needed, taking into account possible changes in exposure and vulnerability.  
46  
47  
48

## 49 50 **CONCLUSIONS**

51  
52 Projected changes in temperature and the number of extreme heat events with climate change could  
53  
54 substantially influence respiratory morbidity across Europe. Analyses projected that both the future  
55  
56 proportion of annual RHAs attributed to heat and the relative change in heat related RHAs will be  
57  
58 largest in Southern Europe, where they are expected to nearly triple. Eastern Europe can expect the  
59  
60

1  
2  
3 smallest increase in heat related RHAs, where they are estimated to approximately double. For all of  
4  
5 Europe, the number of respiratory heat-related hospital admissions is projected to be 26,000  
6  
7 annually in the future period (2021–2050) compared with 11,000 in the reference period (1981–  
8  
9 2010).  
10

11  
12  
13  
14  
15  
16  
17  
18  
19 **Funding Statement** : This work was supported by the EU-funded Climate-Trap project (contract EAHC  
20  
21 20081108) and by the Swedish Environmental Protection Agency through the research programme  
22  
23 CLEO – Climate Change and Environmental Objectives. We would also like to acknowledge Estonia's  
24  
25 Ministry of Education for providing resources to H. Orru with the grant SF0180060s09.  
26

27  
28 **Contribution statement:** CÅ, BF, HO has planned and designed the study. GS represented SMHI and  
29  
30 provided climate data. CÅ ran the analyses, drafted the first manuscript and is guarantor. All authors  
31  
32 have participated in the interpretation of results and revised the manuscript.  
33

34  
35  
36 The specific estimates for each of the EU27 countries, for each of the climate projections is available  
37  
38 after contact with corresponding author.  
39

40  
41 **Competing Interests Statement:** There are no competing interests .  
42

43  
44 **Data Sharing Statement:** The specific estimates for each of the EU27 countries, for each of the  
45  
46 climate projections is available after contact with corresponding author.  
47  
48

## REFERENCES

1. Loddenkemper R, Gibson G, Sibille Y. European lung white book. *European Respiratory Society/European Lung Foundation, Sheffield, UK, ERSJ* 2003:1-182.
2. Ayres JG, Forsberg B, Annesi-Maesano I, et al. Climate change and respiratory disease: European Respiratory Society position statement. *Eur Respir J* 2009;34(2):295-302.
3. Michelozzi P, Accetta G, De Sario M, et al. High temperature and hospitalizations for cardiovascular and respiratory causes in 12 European cities. *Am J Respir Crit Care Med* 2009;179(5):383-9.
4. Rocklöv J, Forsberg B. Comparing approaches for studying the effects of climate extremes - a case study of hospital admissions in Sweden during an extremely warm summer. *Glob Health Action* 2009;2.
5. Kovats RS, Hajat S. Heat stress and public health: a critical review. *Annu Rev Public Health* 2008;29:41-55.
6. Knowlton K, Rotkin-Ellman M, King G, et al. The 2006 California heat wave: impacts on hospitalizations and emergency department visits. *Environ Health Perspect* 2009;117(1):61-7.
7. Rey G, Jouglu E, Fouillet A, et al. The impact of major heat waves on all-cause and cause-specific mortality in France from 1971 to 2003. *Int Arch Occup Environ Health* 2007;80(7):615-26.
8. Ye X, Wolff R, Yu W, et al. Ambient Temperature and Morbidity: A Review of Epidemiological Evidence. *Environ Health Perspect* 2011.
9. Semenza JC, McCullough JE, Flanders WD, et al. Excess hospital admissions during the July 1995 heat wave in Chicago. *Am J Prev Med* 1999;16(4):269-77.
10. Dhainaut JF, Claessens YE, Ginsburg C, et al. Unprecedented heat-related deaths during the 2003 heat wave in Paris: consequences on emergency departments. *Crit Care* 2004;8(1):1-2.
11. IPCC. *Managing the Risks of Extreme Events and Disasters to Advance Climate Change Adaptation - Summary for Policymakers*. Geneva, Switzerland: World Meteorological Organization, 2012.
12. Nikulin G, Kjellström E, Hansson ULF, et al. Evaluation and future projections of temperature, precipitation and wind extremes over Europe in an ensemble of regional climate simulations. *Tellus A* 2011;63(1):41-55.
13. Schar C, Vidale PL, Luthi D, et al. The role of increasing temperature variability in European summer heatwaves. *Nature* 2004;427(6972):332-6.
14. Stott PA, Stone DA, Allen MR. Human contribution to the European heatwave of 2003 (vol 432, pg 610, 2004). *Nature* 2005;436(7054):1200-00.
15. Rebetez M, Dupont O, Giroud M. An analysis of the July 2006 heatwave extent in Europe compared to the record year of 2003. *Theoretical and Applied Climatology* 2009;95(1):1-7.
16. Barriopedro D, Fischer EM, Luterbacher J, et al. The Hot Summer of 2010: Redrawing the Temperature Record Map of Europe. *Science* 2011.
17. Samuelsson P, Jones CG, Willen U, et al. The Rossby Centre Regional Climate model RCA3: model description and performance. *Tellus Series a-Dynamic Meteorology and Oceanography* 2011;63(1):4-23.
18. Collins WD, Bitz CM, Blackmon ML, et al. The Community Climate System Model version 3 (CCSM3). *J Climate* 2006;19(11):2122-43.
19. Roeckner E, Bäuml G, Bonaventura L, et al. The atmospheric general circulation model ECHAM 5. PART I: Model description. Hamburg, Germany: MPI für Meteorologie, 2003.
20. Johns TC, Durman CF, Banks HT, et al. The new Hadley Centre Climate Model (HadGEM1): Evaluation of coupled simulations. *J Climate* 2006;19(7):1327-53.
21. Roeckner E, Arpe K, Bengtsson, et al. The atmospheric general circulation model {ECHAM}-4: {M}odel description and simulation of present-day climate, 1996:103-23.
22. Nakicenovic N, Alcamo J, Davis G, et al. Special report on emissions scenarios: a special report of Working Group III of the Intergovernmental Panel on Climate Change: Pacific Northwest

- 1  
2  
3 National Laboratory, Richland, WA (US), Environmental Molecular Sciences Laboratory (US),  
4 2000.
- 5 23. Ballester J, Robine JM, Herrmann FR, et al. Long-term projections and acclimatization scenarios of  
6 temperature-related mortality in Europe. *Nat Commun* 2011;2:358.
- 7 24. Knowlton K, Lynn B, Goldberg RA, et al. Projecting heat-related mortality impacts under a  
8 changing climate in the New York City region. *American Journal of Public Health*  
9 2007;97(11):2028-34.
- 10 25. Baccini M, Kosatsky T, Analitis A, et al. Impact of heat on mortality in 15 European cities:  
11 attributable deaths under different weather scenarios. *J Epidemiol Community Health*  
12 2011;65(1):64-70.
- 13 26. Beguin A, Hales S, Rocklov J, et al. The opposing effects of climate change and socio-economic  
14 development on the global distribution of malaria. *Global Environmental Change-Human and*  
15 *Policy Dimensions* 2011;21(4):1209-14.
- 16 27. Goldewijk KK, Beusen A, Janssen P. Long-term dynamic modeling of global population and built-  
17 up area in a spatially explicit way: HYDE 3.1. *Holocene* 2010;20(4):565-73.
- 18 28. Lawrence MG. The Relationship between Relative Humidity and the Dewpoint Temperature in  
19 Moist Air: A Simple Conversion and Applications. *Bulletin of the American Meteorological*  
20 *Society* 2005;86(2):225-33.
- 21 29. Parsons KC. *Human thermal environments: the effects of hot, moderate, and cold environments*  
22 *on human health, comfort, and performance*: Taylor & Francis, 2003.
- 23 30. Steadman RG. A Universal Scale of Apparent Temperature. *J Clim Appl Meteorol*  
24 1984;23(12):1674-87.
- 25 31. Oke TR. City size and the urban heat island. *Atmospheric Environment (1967)* 1973;7(8):769-79.
- 26 32. Holmer B, Thorsson S, Eliasson I. COOLING RATES, SKY VIEW FACTORS AND THE DEVELOPMENT  
27 OF INTRA - URBAN AIR TEMPERATURE DIFFERENCES. *Geografiska Annaler: Series A, Physical*  
28 *Geography* 2007;89(4):237-48.
- 29 33. Nicholls N, Skinner C, Loughnan M, et al. A simple heat alert system for Melbourne, Australia. *Int J*  
30 *Biometeorol* 2008;52(5):375-84.
- 31 34. Orru H, Andersson C, Ebi KL, et al. Impact of climate change on ozone related mortality and  
32 morbidity in Europe (Accepted). *Eur Respir J* 2012.
- 33 35. Davis RE, Knappenberger PC, Michaels PJ, et al. Changing heat-related mortality in the United  
34 States. *Environmental health perspectives* 2003;111(14):1712.
- 35 36. Rocklov J, Forsberg B, Meister K. Winter mortality modifies the heat-mortality association the  
36 following summer. *Eur Respir J* 2009;33(2):245-51.
- 37 37. Baccini M, Biggeri A, Accetta G, et al. Heat effects on mortality in 15 European cities.  
38 *Epidemiology* 2008;19(5):711-9.
- 39 38. Giannakouris K. Ageing characterises the demographic perspectives of the European societies.  
40 *Statistics in focus* 2008;72:2008.
- 41  
42  
43  
44  
45  
46  
47  
48  
49  
50  
51  
52  
53  
54  
55  
56  
57  
58  
59  
60



1  
2  
3 **Figure 1. The range of the absolute increase in RHAs attributed to heat between the two periods**  
4 **(1981-2010, 2021-2050) as proportion the annual expected number of RHAs for each of the 27**  
5 **countries. The points show the highest and lowest estimate from four climate models under two**  
6 **emission scenarios.**  
7  
8  
9  
10  
11  
12  
13  
14  
15  
16  
17  
18  
19  
20  
21  
22  
23  
24  
25  
26  
27  
28  
29  
30  
31  
32  
33  
34  
35  
36  
37  
38  
39  
40  
41  
42  
43  
44  
45  
46  
47  
48  
49  
50  
51  
52  
53  
54  
55  
56  
57  
58  
59  
60

For peer review only

1  
2  
3  
4  
5  
6  
7  
8  
9  
10  
11  
12  
13  
14  
15  
16  
17  
18  
19  
20  
21  
22  
23  
24  
25  
26  
27  
28  
29  
30  
31  
32  
33  
34  
35  
36  
37  
38  
39  
40  
41  
42  
43  
44  
45  
46  
47  
48  
49  
50  
51  
52  
53  
54  
55  
56  
57  
58  
59  
60

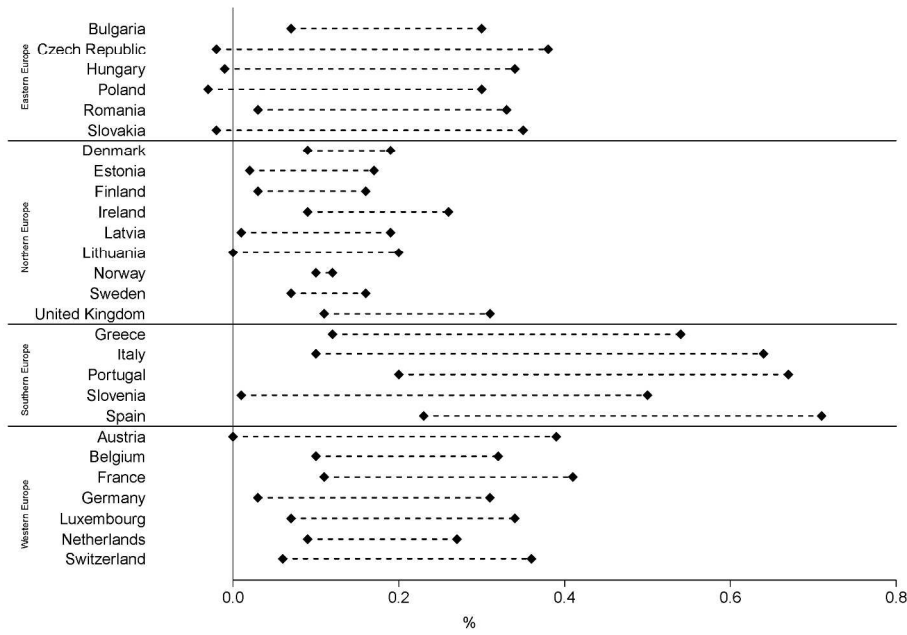

406x279mm (200 x 200 DPI)

view only

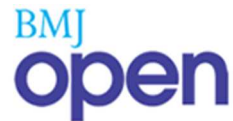

**Heat related respiratory hospital admissions in Europe in a changing climate: A health impact assessment**

|                                 |                                                                                                                                                                                                                                                                                                                                                                                                               |
|---------------------------------|---------------------------------------------------------------------------------------------------------------------------------------------------------------------------------------------------------------------------------------------------------------------------------------------------------------------------------------------------------------------------------------------------------------|
| Journal:                        | <i>BMJ Open</i>                                                                                                                                                                                                                                                                                                                                                                                               |
| Manuscript ID:                  | bmjopen-2012-001842.R1                                                                                                                                                                                                                                                                                                                                                                                        |
| Article Type:                   | Research                                                                                                                                                                                                                                                                                                                                                                                                      |
| Date Submitted by the Author:   | 16-Nov-2012                                                                                                                                                                                                                                                                                                                                                                                                   |
| Complete List of Authors:       | Åström, Christofer; Umeå University, Department of Public Health and Clinical Medicine<br>Orru, Hans<br>Rocklöv, Joacim; Umeå University, Department of Public Health and Clinical Medicine<br>Strandberg, Gustav; Swedish Meteorological and Hydrological Institute,<br>Ebi, Kristie; Stanford University, ClimAdapt<br>Forsberg, Bertil; Umeå University, Department of Public Health and Clinical Medicine |
| <b>Primary Subject Heading</b>: | Epidemiology                                                                                                                                                                                                                                                                                                                                                                                                  |
| Secondary Subject Heading:      | Epidemiology, Occupational and environmental medicine                                                                                                                                                                                                                                                                                                                                                         |
| Keywords:                       | EPIDEMIOLOGY, PUBLIC HEALTH, Epidemiology < THORACIC MEDICINE                                                                                                                                                                                                                                                                                                                                                 |
|                                 |                                                                                                                                                                                                                                                                                                                                                                                                               |

SCHOLARONE™  
Manuscripts

# Heat related respiratory hospital admissions in Europe in a changing climate

## Authors:

Christofer Åström<sup>1\*</sup>, Hans Orru<sup>1,2</sup>, Joacim Rocklöv<sup>1,3</sup>, Gustav Strandberg<sup>4</sup>, Kristie L. Ebi<sup>5</sup>, Bertil Forsberg<sup>1</sup>

## Affiliations:

<sup>1</sup> Department of Public Health and Clinical Medicine, Occupational and Environmental Medicine, Umeå University, Umeå, Sweden; <sup>2</sup> Department of Public Health, University of Tartu, Tartu, Estonia; <sup>3</sup> Department of Public Health and Clinical Medicine, Epidemiology and Global Health, Umeå University, Umeå, Sweden; <sup>4</sup> Swedish Meteorological and Hydrological Institute, Norrköping, Sweden; <sup>5</sup> ClimAdapt, Stanford University, Los Altos, California, USA

## Corresponding author:

\* Author to whom correspondence should be addressed:

Christofer Åström,

Occupational and Environmental Medicine, Department of Public Health and Clinical Medicine, Umeå University, SE 901 87, Sweden

+4690 785 0874

[christofer.astrom@envmed.umu.se](mailto:christofer.astrom@envmed.umu.se)

**Keywords:** Climate change, respiratory health, public health, heat

**Word count:** 3045

## ARTICLE SUMMARY

## Article focus

To assess how heat related respiratory hospital admissions in Europe are expected to change with the global warming in the near future. With a range of climate change projections explore the range of the different impact estimates.

## Key messages

The 30 year mean annual increase in respiratory hospital admissions related to heat between the periods 1981-2010 and 2021-2050 can be counted in 10's of thousands.

The increase will be different in different parts of Europe with the largest relative increase in Southern Europe.

## Strengths and limitations

The study takes the spatial variation in both climate and population density into account in the impact calculations. This makes the estimates valid for countries with large national differences in population densities and climate.

The study results exemplifies some the variation of the impacts depending on different climate change scenarios as well as the variations within one climate scenario depending on the underlying climate model.

The use of real spatial population data has limited the study to explore the change in all age respiratory hospital admissions without demographic trends. The fact that the elderly is a well-known risk group when studying heat related illness combined with the future rise of the proportion of elderly people in the population may suggest that the estimated impacts are rather conservative

## ABSTRACT

Respiratory diseases are ranked second in Europe in terms of mortality, prevalence and costs. Studies have shown that extreme heat has a large impact on mortality and morbidity, with a large relative increase for respiratory diseases. Expected increases in mean temperature and the number of extreme heat events over the coming decades due to climate change raise questions about the possible health impacts.

Heat-related respiratory hospital admissions under a changing climate are projected using multi-city epidemiologic exposure-response relationships applied to gridded population data and country-specific baseline respiratory hospital admission rates. Times-series of temperatures are simulated with a regional climate model based on four global climate models, under two greenhouse gas emission scenarios (A1B & A2).

Between a reference period (1981–2010) and a future period (2021–2050), the total number of respiratory hospital admissions attributed to heat is projected to be larger in Southern Europe, with three-times more heat attributed respiratory hospital admissions in the future period. The smallest change was estimated in Eastern Europe with about a two-fold increase. For all of Europe, the number of respiratory heat-related hospital admissions is projected to be 26,000 annually in the future period compared with 11,000 in the reference period.

The results suggest that projected effects of climate change on temperature and the number of extreme heat events could substantially influence respiratory morbidity across Europe.

## INTRODUCTION

Respiratory diseases are ranked second in Europe in terms of mortality, prevalence and costs.<sup>1</sup> This burden is expected to increase, partly due to a changing climate.<sup>2</sup> An environmental factor with a large impact on mortality and morbidity in Europe is extreme heat, with large effects on respiratory diseases.<sup>3-5</sup> Physiological effects of exposure to heat can be directly heat related (heat stroke, heat fatigue and dehydration) or can contribute to worsening of respiratory and cardiovascular diseases, electrolyte disorders, and kidney problems.<sup>4-7</sup> The reasons for an increase in respiratory admissions may be several. Elderly with respiratory diseases such as COPD are less fit and suffer often from circulatory problems. Heat influenced admissions due to chronic airway obstruction and asthma increased more than admissions due to chronic bronchitis in a study from New York City,<sup>8</sup> but the daily number of admissions seldom allow a study of specific diagnoses. In a recent expert elicitation amongst European researchers engaged in environmental medicine or respiratory health, extreme heat stood out as most important climate related pathway to adverse impacts on respiratory health, more important than changes in air pollutants and allergens.<sup>9</sup> A review found that heatwaves have a stronger relative impact on mortality than on emergency room visits and hospital admissions, suggesting that many individuals die before they can get to the hospital.<sup>10</sup> However, several studies confirm that heat also affects health care utilisation.<sup>3 11</sup> During the heatwave of 2003 in France, the Assistance Public Hôpitaux de Paris recorded 2,400 additional visits to the emergency care units and 1,900 additional hospital admissions.<sup>12</sup> During the heatwave in California in 2006 there were almost 1,200 hospital admissions together with more than 16,000 visits to the emergency departments.<sup>6</sup>

It is possible that hospital admissions could increase in the future due to temperature changes projected with climate change, assuming no additional acclimatisation. Projected changes include an increase in global mean temperature of 1.8°C to 4.0°C by the end of this century, with larger increases over land areas at high latitudes, changing seasonal temperatures, and increases in the frequency, intensity, duration, and spatial extent of heatwaves.<sup>13</sup> Recent projections for 2070–2100

1  
2  
3 suggest that maximum temperatures experienced once every 20 years during the period 1961–1990  
4  
5 could be expected as often as every year in southern Europe and every 3rd-5th year in northern  
6  
7 Europe.<sup>14</sup> This means that Europe should expect an increase in both mean temperatures and the  
8  
9 number of extreme heat events. Recent heatwaves are consistent with projections. For example, the  
10  
11 heatwave that occurred in Europe 2003 could be expected to return every 46,000 years, based on  
12  
13 the temperature distribution for the years 1864–2000.<sup>15</sup> However, such extreme hot conditions may  
14  
15 become much more common in the end of this century due to anthropogenic climate changes.<sup>16</sup> The  
16  
17 uncertainty in this estimated return time is quite high, with a lower bound of the 90% confidence  
18  
19 interval of 9,000 years. Even so, another heatwave occurred in 2006 with the most anomalous July  
20  
21 temperature ever measured in Europe.<sup>17</sup> In 2010, Eastern Europe experienced a heatwave with  
22  
23 summer temperatures higher than the last 140 years, resulting in roughly 55,000 excess deaths in  
24  
25 Russia.<sup>18</sup>

26  
27  
28  
29  
30 The possible impacts of these changes on morbidity, particularly respiratory health, are relatively  
31  
32 unexplored.

### 33 34 35 **Aim**

36  
37 The aim of this study is to assess the extent to which changes in the frequency of hot days due to  
38  
39 climate change over the next 40 years could affect heat related respiratory hospital admissions  
40  
41 (RHAs) in Europe. Using a range of climate projections, we estimate the change in hospital  
42  
43 admissions between a reference period and a future period.

## 44 45 46 47 **METHODS**

### 48 49 50 **Climate change and temperature modelling**

51  
52 The Rossby Centre regional atmospheric climate model RCA3<sup>19</sup> was developed by SMHI (Swedish  
53  
54 meteorological and hydrological institute) to dynamically downscale results from the global climate  
55  
56 models CCSM3<sup>20</sup>, ECHAM5<sup>21</sup>, HadleyCM3<sup>22</sup> and ECHAM4<sup>23</sup> to a higher resolution over Europe. RCA3 is  
57  
58  
59  
60



1  
2  
3 run on a horizontal grid spacing of 0.44° (corresponding to approximately 50 km) and a time step of  
4  
5 30 minutes. Projections are based on the global greenhouse gas emission scenarios A1B and A2  
6  
7 (scenarios are described in detail in the SRES<sup>24</sup>). Both have been used in climate change health  
8  
9 impact assessments (HIA).<sup>25-28</sup> A1B is a “middle of the road” scenario and A2 is considered a high  
10  
11 emission scenario, although recent greenhouse gas emissions have been higher. Data from one  
12  
13 climate model, under one climate change scenario, is referred to as one climate change projection.  
14  
15

16  
17 We use aggregated daily projections of maximum temperature and relative humidity data to  
18  
19 estimate exposure for the periods 1981–2020 (reference period) and 2021–2050 (future period).  
20  
21

## 22 **Population and morbidity rates**

23  
24 The annual country specific rate of respiratory hospital admissions between 2005 and 2010 were  
25  
26 extracted from the WHO’s European Health for All Database (<http://data.euro.who.int/hfadb>) for the  
27  
28 EU27 countries. The mean value over the six years was used as a baseline morbidity rate. Official  
29  
30 population data were from the HYDE theme within the Netherlands Environmental Assessment  
31  
32 Agency.<sup>29</sup> These data are gridded on a 0.0833° resolution (approximately 9,45km) and matched with  
33  
34 the climatic data by summing the population within each climatic grid cell.  
35  
36  
37

## 38 **Exposure-response assumption**

39  
40 The impact calculations were based on the relationship between heat and RHAs (ICD-9:460–519)  
41  
42 estimated within the European PHEWE (Assessment and Prevention of Acute Health Effects of  
43  
44 Weather Conditions in Europe) project.<sup>3</sup> This relationship was based on analyses of 12 European  
45  
46 cities over the 1990s, using the daily maximum of apparent temperature (AT), where AT is a  
47  
48 combination of the measured temperature and the dew point temperature:  
49  
50

$$51 \text{ AT} = -2.653 + 0.944 * T + 0.0153 * (DT)^2$$

52  
53  
54  
55 where T is the air temperature and DP the dew point temperature, which can be derived from  
56  
57 temperature and relative humidity.<sup>30</sup> The AT accounts for heat stress related not only to the absolute  
58  
59  
60

1  
2  
3 temperature but also to the saturation of the surrounding air that makes it harder to regulate body  
4  
5 temperature by sweating, the most important mechanism to maintain a healthy body temperature.<sup>31</sup>  
6

7  
8 <sup>32</sup> The PHEWE model also included potential confounders such as air pollution, holidays, week days  
9  
10 etc. The study used a 0–3 day lag of the maximum AT and concluded that the 90th percentile of this  
11  
12 exposure variable for the summer months, April to September, is the appropriate threshold value for  
13  
14 the heat-morbidity function.<sup>3</sup> We calculated the 90th percentile for the summer months for each grid  
15  
16 cell from the climate data for the 1990s, yielding individual thresholds for each grid cell for each  
17  
18 climate projection.  
19

20  
21 The PHEWE study calculated the relative risk (RR) coefficients for each of the 12 cities and then  
22  
23 combined these into two meta-coefficients, for North-Continental cities 1.012 (95% CI 1.001–1.022)  
24  
25 and Mediterranean cities 1.021 (95% CI 1.006–1.036), associated with a 1-degree increase above the  
26  
27 temperature threshold. Meta-coefficients were more suitable as they allowed calculation of the  
28  
29 change in RHAs for countries with and without a city in the PHEWE Study. We assigned the  
30  
31 Mediterranean coefficient to Portugal and the Mediterranean countries. The rest of Europe was  
32  
33 assigned the RR for the North continental cities. Statistically significant coefficients were found for all  
34  
35 ages and age 75+ in the PHEWE study. Because the population data were not stratified by age, we  
36  
37 used the PHEWE study coefficients for all ages.  
38  
39

## 40 41 42 **Projections**

43  
44 The final data used in the impact calculations were based on the climate data grid with a resolution  
45  
46 of 0.44° resulting in 8,075 grid cells over Europe. The population data, RR coefficients and baseline  
47  
48 morbidity rates were projected for each grid cell. The countries within EU27 were grouped into four  
49  
50 regions, Northern, Western, Eastern and Southern Europe, according to the United Nations  
51  
52 classification scheme (<http://unstats.un.org/unsd/methods/m49/m49regin.htm#europe>).  
53  
54

55  
56 Thus, each grid cell includes (1) a daily time-series of 0–3 day lag maximum AT for each climate  
57  
58 change projection; (2) a grid cell specific temperature morbidity threshold and a location-based RR  
59  
60

1  
2  
3 coefficient; and (3) population. For each grid cell, the AT was compared to the specific threshold for  
4  
5 each day in the two time periods and risk estimates were calculated for each day. The expected  
6  
7 number of daily RHAs in each cell was calculated using the population and the expected daily number  
8  
9 of RHAs per capita, based on the national average of the grid cell.  
10

$$RHA_{i,t} = RR_i^{(AT_{i,t} - Thres_i)_+} * Pop_i * RHAp_c_i$$

11  
12 where  $RHA_{i,t}$  is the number of RHAs attributable to heat in grid cell  $i$  at time  $t$ ,  $RR_i$  the RR coefficient in  
13  
14 grid cell  $i$ ,  $(AT_{i,t} - Thres_i)_+$  the difference between the 0–3 lag AT and the threshold for grid cell  $i$  at  
15  
16 time  $t$  if  $AT_{i,t}$  were greater than the threshold and 0 otherwise,  $Pop_i$  and  $RHAp_c_i$  the population and  
17  
18 expected number RHAs per capita in grid cell  $i$ .  
19  
20  
21  
22  
23  
24

25 For each country, the estimated number of RHAs attributed to heat was calculated for each climate  
26  
27 change projection, for both the reference and the future period. The estimated number of RHAs  
28  
29 attributed to heat was then transformed into the proportion of the expected annual number RHAs  
30  
31 for each country (data available from the authors). Mean estimates were calculated for each region  
32  
33 for each climate change projection.  
34  
35  
36

### 37 **Sensitivity analysis**

38 Because the study results could heavily depend on the RR coefficients and thresholds used, we assess  
39  
40 whether the estimates appeared sensitive to the region-specific meta-coefficients. We investigated  
41  
42 the grids that contained the cities in the PHEWE study using both the location (Mediterranean or  
43  
44 North-Continental) and city specific RR coefficients.<sup>3</sup> We then compared the results with respect to  
45  
46 the attributed proportion of RHAs and the proportional change in heat related RHAs.  
47  
48  
49  
50  
51  
52

## 53 **RESULTS**

54  
55  
56  
57  
58  
59  
60

The periods of warm days will increase in the future. For the cities included in the sensitivity analysis, the temperature threshold was exceeded by 20 days in the baseline period and 40 days in the future period, on average each year.

In the future period approximately 0.4% of the annual numbers of RHAs in Europe was estimated to be due to heat (Table 1), based on the mean estimates over the climate change projections. In absolute terms, assuming all else equal, this represents about 26,000 cases annually in Europe. This should be compared to the reference period where approximately 0.18% of all RHAs were attributed to heat or about 11,000 cases annually. Thus, the results suggest more than a relative doubling of the RHAs attributed to heat in Europe.

**Table 1.** The estimated proportion of RHAs attributed to heat for each region. Intervals describe the highest and lowest estimate in each region

| Region          | 1981–2010             | 2021–2050             | Change                |
|-----------------|-----------------------|-----------------------|-----------------------|
| Eastern Europe  | 0.17% (0.16% – 0.19%) | 0.31% (0.29% – 0.35%) | 0.14% (0.11% – 0.17%) |
| Northern Europe | 0.13% (0.10% – 0.15%) | 0.27% (0.19% – 0.32%) | 0.14% (0.07% – 0.17%) |
| Southern Europe | 0.23% (0.18% – 0.26%) | 0.64% (0.42% – 0.68%) | 0.41% (0.23% – 0.44%) |
| Western Europe  | 0.18% (0.16% – 0.20%) | 0.39% (0.34% – 0.45%) | 0.21% (0.17% – 0.26%) |
| EU27            | 0.18% (0.10% – 0.26%) | 0.40% (0.19% – 0.68%) | 0.21% (0.07% – 0.44%) |

On the regional level, the five projections estimate increases in the number of heat related RHAs for Europe (Table 2). However, in one climate change projection, The Czech Republic, Hungary, Poland and Slovakia were estimated to have a decrease in heat related RHAs (Fig 1). The countries with the highest estimated increase also show the largest range between the highest and lowest estimate. The Scandinavian and Baltic countries show the smallest range between the highest and lowest estimates along with small increases of the mean estimates.

**Table 2.** Future increase in heat related RHAs based on the four climate models, under two emission scenarios, as the percentage of the annual expected number of RHAs in each region

| Climate model                  | CCSM3      | ECHAM5 | HadCM3    | ECHAM4 | ECHAM5 |
|--------------------------------|------------|--------|-----------|--------|--------|
| <i>Greenhouse gas scenario</i> | <i>A1B</i> |        | <i>A2</i> |        |        |
| Eastern Europe                 | 0.32%      | 0.08%  | 0.18%     | 0.12%  | 0.01%  |
| Northern Europe                | 0.17%      | 0.09%  | 0.14%     | 0.20%  | 0.08%  |
| Southern Europe                | 0.51%      | 0.29%  | 0.64%     | 0.45%  | 0.14%  |
| Western Europe                 | 0.30%      | 0.11%  | 0.26%     | 0.29%  | 0.06%  |
| EU27                           | 0.32%      | 0.13%  | 0.29%     | 0.26%  | 0.07%  |

There is variation among countries, with the largest increases in the Southern European countries and the smallest increase in Eastern Europe (Table 2). The relative change in the burden of RHA's in relation to the climate change scenarios investigated indicate a larger relative increase in Mediterranean countries (approximately three times) compared to Northern European countries (approximately two times).

### Sensitivity analysis

The calculations using the city specific RR coefficients yielded a different proportion and number of estimated RHAs than the ones using the two meta-coefficients, as expected. However, the relative changes in the number of hospital admissions attributed to heat between the two time-periods were not affected by the change of the RR coefficients.

## DISCUSSION

The analysis estimates that the number of RHAs will increase in a warmer climate with more hot days. Heat related RHAs were projected to increase two- to three-fold in the future due to climate change. However, the proportion of respiratory admissions attributed to heat would remain rather small. This projection is in line with the results of a recent study which estimates that the respiratory admissions due to excessive heat in New York State will increase 2-6 times from the period 1991-2004 to the period 2080-2099.<sup>33</sup>

1  
2  
3 As most heat related health outcomes occur during the warmest period of the year, presenting the  
4  
5 increase as a change in the proportion of the total number of annual RHAs can underestimate the  
6  
7 additional burden on the health care system during summer. As the threshold was exceeded for  
8  
9 approximately 40 days in one year, an annual increase of 0.21% would result in a 1.9% increase on  
10  
11 average during these 40 days. The annual numbers are used because the available baseline rates of  
12  
13 RHAs are expressed as an annual average. Applying results to sub-national scales could be  
14  
15 inappropriate because national averages summarize over considerable heterogeneity.  
16  
17

18  
19 The results suggest a larger impact from heat in Southern Europe in the future period, centred on  
20  
21 year 2035, than in the eastern and northern parts. This is in line with many climate change  
22  
23 projections showing a larger relative increase in the number of extremely hot days in southern  
24  
25 Europe compared with northern Europe.<sup>14</sup> However, to some extent this might also be explained by  
26  
27 model bias for northern Europe introduced by the RCA3 model, where the model appears to  
28  
29 underestimate temperature for the warmest days.<sup>19</sup> This temperature bias is present in the reference  
30  
31 period, future period, and threshold values; therefore, the estimated numbers of RHAs from the two  
32  
33 periods within each scenario are comparable, but comparisons within the same time-period, across  
34  
35 scenarios may be inaccurate.  
36  
37

38  
39 As the estimates are based on the population size in each grid cell, the added burden will be larger in  
40  
41 countries with larger increases in temperatures in densely populated areas. Because the population  
42  
43 of a city is considered a good predictor of the size of the urban heat island,<sup>34</sup> an increase in the  
44  
45 population living in urban areas will increase the numbers exposed and the temperature to which  
46  
47 they are exposed. Heat islands increase temperatures in urbanized areas compared to surrounding  
48  
49 areas, also reducing cooling during the night time.<sup>35</sup> These factors combined are likely to magnify the  
50  
51 health burden during a heatwave.<sup>36</sup> The coarse spatial scale of the climate models makes them  
52  
53 unable to take the urban heat island effect into account. Together with the urbanization of Europe,  
54  
55 this could potentially result in underestimation of actual consequences/RHAs in the future period  
56  
57  
58  
59  
60

1  
2  
3 because the same population size and composition were assumed in both periods. In addition,  
4  
5 climate change is likely to increase ozone concentrations that would add an additional health burden  
6  
7 for people at risk of respiratory diseases. The number of deaths and RHAs, due to a change in ozone,  
8  
9 is expected to change in the future.<sup>37</sup> A sensitivity analysis in the PHEWE study however showed that  
10  
11 the exposure-response relationship for heat did not substantially differ between models taking ozone  
12  
13 into account and models adjusting for NO<sub>2</sub> alone.<sup>3</sup>  
14

15  
16 We used the same thresholds for the reference and future period to isolate the effect of climate  
17  
18 change. This would tend to overestimate the increased impact because there will undoubtedly be  
19  
20 biological and/or social adaptations that will reduce future health temperature-related burdens.  
21  
22 However, given the uncertainty of such adaptation effects, we choose to not incorporate such effects  
23  
24 in the projections. Recent studies in the U.S indicate heat related health burdens have decreased,<sup>38</sup>  
25  
26 indicating that some adaptation is taking place. An opposite trend appears to be occurring in  
27  
28 Stockholm, with an increase of the risk of mortality associated with heat during the 1990s.<sup>39</sup> A study  
29  
30 looking at the impact of heat on mortality, before and after the implementation of a heat warning  
31  
32 system, in Italy shows that the effects of extreme heat can be reduced while the effects of moderate  
33  
34 increased average temperatures remains similar.<sup>40</sup> The magnitude and the extent of future  
35  
36 adaptation is, of course, highly uncertain, and will vary between and within countries. Nevertheless,  
37  
38 cities with higher thresholds seem to have higher risk ratio coefficients.<sup>3 41</sup> In an effort to estimate  
39  
40 future and presumably higher thresholds, one must also adjust the risk ratio coefficients. This would  
41  
42 result in fewer days of elevated risk, but the risk increase on each occasion could be higher due to  
43  
44 the higher RRs.  
45  
46  
47  
48

49  
50 Table 1 shows how the results vary by global climate models and greenhouse gas scenarios. This  
51  
52 study exemplifies the magnitude of the difference between projections made by a model with  
53  
54 different initial conditions and between different models with the same initial conditions. The results  
55  
56 indicate the range of these estimates is large. The mean increase over the five projections however,  
57  
58  
59  
60

1  
2  
3 provides confidence that the number of RHAs will increase over Europe as the climate continues to  
4  
5 change.  
6

7  
8 To improve the estimates of the impacts of heat on RHAs, detailed data on emergency room visits  
9  
10 and admissions during summer are needed, such as the proportion of emergency department cases  
11  
12 admitted to hospital, and the fatality rate. A better understanding of vulnerable groups is needed,  
13  
14 including how these groups could change over time. For example, the portion of the population aged  
15  
16 over 65 will increase from 17 to 29%<sup>42</sup> by 2050, significantly increasing the size of this vulnerable  
17  
18 group. COPD is mainly a disease of the elderly. Persons suffering from COPD appear especially  
19  
20 vulnerable to heat<sup>43</sup> and the incidence of COPD is likely to increase<sup>44</sup> with the consequence that the  
21  
22 health impacts of heat may increase in future years. This study was limited to estimating the impacts  
23  
24 on the total population because few age-specific relationships were reported and because age  
25  
26 stratified data were only available on a coarser spatial scale than the climate data, which would  
27  
28 reduce the benefits of having spatial climate data.  
29  
30  
31

32  
33 Normal weather patterns in the future will be different than those of today, both for average  
34  
35 temperature and extreme weather events. As the number of heat related RHAs are expected to  
36  
37 increase on the sub-continental scale, additional national or regional projections of the future health  
38  
39 burden from heat are needed, taking into account possible changes in exposure and vulnerability.  
40  
41  
42

## 43 44 **CONCLUSIONS**

45  
46 Projected changes in temperature and the number of extreme heat events with climate change could  
47  
48 substantially influence respiratory morbidity across Europe. Analyses projected that both the future  
49  
50 proportion of annual RHAs attributed to heat and the relative change in heat related RHAs will be  
51  
52 largest in Southern Europe, where they are expected to nearly triple. Eastern Europe can expect the  
53  
54 smallest increase in heat related RHAs, where they are estimated to approximately double. For all of  
55  
56 Europe, the number of respiratory heat-related hospital admissions is projected to be 26,000  
57  
58  
59  
60



1  
2  
3 annually in the future period (2021–2050) compared with 11,000 in the reference period (1981–  
4  
5 2010). The estimates presented rely on the assumption that no additional adaptation occurs. Future  
6  
7 studies should elaborate and quantify the possible effects of different adaptation assumptions  
8  
9 applied to regional conditions.  
10

11  
12  
13  
14  
15  
16  
17  
18  
19 This work was supported by the EU-funded Climate-Trap project (contract EAHC 20081108) and by  
20  
21 the Swedish Environmental Protection Agency through the research programme CLEO – Climate  
22  
23 Change and Environmental Objectives. We would also like to acknowledge Estonia's Ministry of  
24  
25 Education for providing resources to H. Orru with the grant SF0180060s09.  
26

27  
28 Contribution statement: CÅ, BF, HO has planned and designed the study. GS represented SMHI and  
29  
30 provided climate data. CÅ ran the analyses, drafted the first manuscript and is guarantor. All authors  
31  
32 have participated in the interpretation of results and revised the manuscript.  
33

34  
35  
36 The specific estimates for each of the EU27 countries, for each of the climate projections is available  
37  
38 after contact with corresponding author.  
39  
40  
41  
42  
43  
44  
45  
46  
47  
48  
49  
50  
51  
52  
53  
54  
55  
56  
57  
58  
59  
60

## REFERENCES

1. Loddenkemper R, Gibson G, Sibille Y. European lung white book. *European Respiratory Society/European Lung Foundation, Sheffield, UK, ERSJ* 2003;1-182.
2. Ayres JG, Forsberg B, Annesi-Maesano I, et al. Climate change and respiratory disease: European Respiratory Society position statement. *Eur Respir J* 2009;34(2):295-302.
3. Michelozzi P, Accetta G, De Sario M, et al. High temperature and hospitalizations for cardiovascular and respiratory causes in 12 European cities. *Am J Respir Crit Care Med* 2009;179(5):383-9.
4. Rocklöv J, Forsberg B. Comparing approaches for studying the effects of climate extremes - a case study of hospital admissions in Sweden during an extremely warm summer. *Glob Health Action* 2009;2.
5. Kovats RS, Hajat S. Heat stress and public health: a critical review. *Annu Rev Public Health* 2008;29:41-55.
6. Knowlton K, Rotkin-Ellman M, King G, et al. The 2006 California heat wave: impacts on hospitalizations and emergency department visits. *Environ Health Perspect* 2009;117(1):61-7.
7. Rey G, Jouglé E, Fouillet A, et al. The impact of major heat waves on all-cause and cause-specific mortality in France from 1971 to 2003. *Int Arch Occup Environ Health* 2007;80(7):615-26.
8. Lin S, Luo M, Walker RJ, et al. Extreme high temperatures and hospital admissions for respiratory and cardiovascular diseases. *Epidemiology* 2009;20(5):738-46.
9. Forsberg B, Braback L, Keune H, et al. An expert assessment on climate change and health - with a European focus on lungs and allergies. *Environ Health* 2012;11 Suppl 1:S4.
10. Ye X, Wolff R, Yu W, et al. Ambient Temperature and Morbidity: A Review of Epidemiological Evidence. *Environ Health Perspect* 2011.
11. Semenza JC, McCullough JE, Flanders WD, et al. Excess hospital admissions during the July 1995 heat wave in Chicago. *Am J Prev Med* 1999;16(4):269-77.
12. Dhainaut JF, Claessens YE, Ginsburg C, et al. Unprecedented heat-related deaths during the 2003 heat wave in Paris: consequences on emergency departments. *Crit Care* 2004;8(1):1-2.
13. IPCC. *Climate Change 2007 - The Physical Science Basis: Working Group I Contribution to the Fourth Assessment Report of the IPCC*. Cambridge, UK and New York, NY, USA: Cambridge University Press, 2007.
14. Nikulin G, Kjellström E, Hansson ULF, et al. Evaluation and future projections of temperature, precipitation and wind extremes over Europe in an ensemble of regional climate simulations. *Tellus A* 2011;63(1):41-55.
15. Schar C, Vidale PL, Luthi D, et al. The role of increasing temperature variability in European summer heatwaves. *Nature* 2004;427(6972):332-6.
16. Stott PA, Stone DA, Allen MR. Human contribution to the European heatwave of 2003. *Nature* 2004;432(7017):610-4.
17. Rebetez M, Dupont O, Giroud M. An analysis of the July 2006 heatwave extent in Europe compared to the record year of 2003. *Theoretical and Applied Climatology* 2009;95(1):1-7.
18. Barriopedro D, Fischer EM, Luterbacher J, et al. The Hot Summer of 2010: Redrawing the Temperature Record Map of Europe. *Science* 2011.
19. Samuelsson P, Jones CG, Willen U, et al. The Rossby Centre Regional Climate model RCA3: model description and performance. *Tellus Series a-Dynamic Meteorology and Oceanography* 2011;63(1):4-23.
20. Collins WD, Bitz CM, Blackmon ML, et al. The Community Climate System Model version 3 (CCSM3). *J Climate* 2006;19(11):2122-43.
21. Roeckner E, Bäuml G, Bonaventura L, et al. The atmospheric general circulation model ECHAM 5. PART I: Model description. Hamburg, Germany: MPI für Meteorologie, 2003.
22. Johns TC, Durman CF, Banks HT, et al. The new Hadley Centre Climate Model (HadGEM1): Evaluation of coupled simulations. *J Climate* 2006;19(7):1327-53.

23. Roeckner E, Arpe K, Bengtsson, et al. The atmospheric general circulation model {ECHAM}-4: {M}odel description and simulation of present-day climate, 1996:103-23.
24. Nakicenovic N, Alcamo J, Davis G, et al. Special report on emissions scenarios: a special report of Working Group III of the Intergovernmental Panel on Climate Change: Pacific Northwest National Laboratory, Richland, WA (US), Environmental Molecular Sciences Laboratory (US), 2000.
25. Ballester J, Robine JM, Herrmann FR, et al. Long-term projections and acclimatization scenarios of temperature-related mortality in Europe. *Nat Commun* 2011;2:358.
26. Knowlton K, Lynn B, Goldberg RA, et al. Projecting heat-related mortality impacts under a changing climate in the New York City region. *American Journal of Public Health* 2007;97(11):2028-34.
27. Baccini M, Kosatsky T, Analitis A, et al. Impact of heat on mortality in 15 European cities: attributable deaths under different weather scenarios. *J Epidemiol Community Health* 2011;65(1):64-70.
28. Beguin A, Hales S, Rocklov J, et al. The opposing effects of climate change and socio-economic development on the global distribution of malaria. *Global Environmental Change-Human and Policy Dimensions* 2011;21(4):1209-14.
29. Goldewijk KK, Beusen A, Janssen P. Long-term dynamic modeling of global population and built-up area in a spatially explicit way: HYDE 3.1. *Holocene* 2010;20(4):565-73.
30. Lawrence MG. The Relationship between Relative Humidity and the Dewpoint Temperature in Moist Air: A Simple Conversion and Applications. *Bulletin of the American Meteorological Society* 2005;86(2):225-33.
31. Parsons KC. *Human thermal environments: the effects of hot, moderate, and cold environments on human health, comfort, and performance*: Taylor & Francis, 2003.
32. Steadman RG. A Universal Scale of Apparent Temperature. *J Clim Appl Meteorol* 1984;23(12):1674-87.
33. Lin S, Hsu WH, Van Zutphen AR, et al. Excessive heat and respiratory hospitalizations in new york state: estimating current and future public health burden related to climate change. *Environ Health Perspect* 2012;120(11):1571-7.
34. Oke TR. City size and the urban heat island. *Atmospheric Environment (1967)* 1973;7(8):769-79.
35. Holmer B, Thorsson S, Eliasson I. COOLING RATES, SKY VIEW FACTORS AND THE DEVELOPMENT OF INTRA - URBAN AIR TEMPERATURE DIFFERENCES. *Geografiska Annaler: Series A, Physical Geography* 2007;89(4):237-48.
36. Nicholls N, Skinner C, Loughnan M, et al. A simple heat alert system for Melbourne, Australia. *Int J Biometeorol* 2008;52(5):375-84.
37. Orru H, Andersson C, Ebi KL, et al. Impact of climate change on ozone related mortality and morbidity in Europe. *Eur Respir J* 2012 Jun 27. [Epub ahead of print].
38. Davis RE, Knappenberger PC, Michaels PJ, et al. Changing heat-related mortality in the United States. *Environmental Health Perspectives* 2003;111(14):1712-18.
39. Rocklov J, Forsberg B, Meister K. Winter mortality modifies the heat-mortality association the following summer. *Eur Respir J* 2009;33(2):245-51.
40. Schifano P, Leone M, De Sario M, et al. Changes in the effects of heat on mortality among the elderly from 1998-2010: results from a multicenter time series study in Italy. *Environmental Health* 2012;11(1):58.
41. Baccini M, Biggeri A, Accetta G, et al. Heat effects on mortality in 15 European cities. *Epidemiology* 2008;19(5):711-9.
42. Giannakouris K. Ageing characterises the demographic perspectives of the European societies. *Statistics in focus* 2008;72:2008.
43. Schwartz J. Who is sensitive to extremes of temperature? A case-only analysis. *Epidemiology* 2005;16(1):67-72.
44. Mannino DM, Buist AS. Global burden of COPD: risk factors, prevalence, and future trends. *Lancet* 2007;370(9589):765-73.

1  
2  
3 **Figure 1. The range of the absolute increase in RHAs attributed to heat between the two**  
4 **periods (1981-2010, 2021-2050) as proportion the annual expected number of RHAs for each of the**  
5 **27 countries. The points show the highest and lowest estimate from four climate models under**  
6 **two emission scenarios.**  
7  
8  
9  
10  
11  
12  
13  
14  
15  
16  
17  
18  
19  
20  
21  
22  
23  
24  
25  
26  
27  
28  
29  
30  
31  
32  
33  
34  
35  
36  
37  
38  
39  
40  
41  
42  
43  
44  
45  
46  
47  
48  
49  
50  
51  
52  
53  
54  
55  
56  
57  
58  
59  
60

For peer review only

# Heat related respiratory hospital admissions in Europe in a changing climate

## Authors:

Christofer Åström<sup>1\*</sup>, Hans Orru<sup>1,2</sup>, Joacim Rocklöv<sup>1,3</sup>, Gustav Strandberg<sup>4</sup>, Kristie L. Ebi<sup>5</sup>, Bertil Forsberg<sup>1</sup>

## Affiliations:

<sup>1</sup> Department of Public Health and Clinical Medicine, Occupational and Environmental Medicine, Umeå University, Umeå, Sweden; <sup>2</sup> Department of Public Health, University of Tartu, Tartu, Estonia; <sup>3</sup> Department of Public Health and Clinical Medicine, Epidemiology and Global Health, Umeå University, Umeå, Sweden; <sup>4</sup> Swedish Meteorological and Hydrological Institute, Norrköping, Sweden; <sup>5</sup> ClimAdapt, Stanford University, Los Altos, California, USA

## Corresponding author:

\* Author to whom correspondence should be addressed:

Christofer Åström,

Occupational and Environmental Medicine, Department of Public Health and Clinical Medicine, Umeå University, SE 901 87, Sweden

+4690 785 0874

[christofer.astrom@envmed.umu.se](mailto:christofer.astrom@envmed.umu.se)

**Keywords:** Climate change, respiratory health, public health, heat

**Word count:** 3045

## ARTICLE SUMMARY

1  
2  
3  
4  
5  
6  
7  
8  
9  
10  
11  
12  
13  
14  
15  
16  
17  
18  
19  
20  
21  
22  
23  
24  
25  
26  
27  
28  
29  
30  
31  
32  
33  
34  
35  
36  
37  
38  
39  
40  
41  
42  
43  
44  
45  
46  
47  
48  
49  
50  
51  
52  
53  
54  
55  
56  
57  
58  
59  
60

## Article focus

To assess how heat related respiratory hospital admissions in Europe are expected to change with the global warming in the near future. With a range of climate change projections explore the range of the different impact estimates.

## Key messages

The 30 year mean annual ~~mean~~ increase in respiratory hospital admissions related to heat between the periods 1981-2010 and 2021-2050 can be counted in 10's of thousands.

The increase will be different in different parts of Europe with the largest relative increase in Southern Europe.

## Strengths and limitations

The study takes the spatial variation in both climate and population density into account in the impact calculations. This makes the estimates valid for countries with large national differences in population densities and climate.

The study results exemplifies some the variation of the impacts depending on different climate change scenarios as well as the variations within one climate scenario depending on the underlying climate model.

The use of real spatial population data has limited the study to explore the change in all age respiratory hospital admissions without demographic trends. The fact that the elderly is a wellknown well-known risk group when studying heat related illness combined with the future rise of the proportion of elderly people in the population may suggest that the estimated impacts are rather conservative.

## ABSTRACT

Respiratory diseases are ranked second in Europe in terms of mortality, prevalence and costs. Studies have shown that extreme heat has a large impact on mortality and morbidity, with a large relative increase for respiratory diseases. Expected increases in mean temperature and the number of extreme heat events over the coming decades due to climate change raise questions about the possible health impacts.

Heat-related respiratory hospital admissions under a changing climate are projected using multi-city epidemiologic exposure-response relationships applied to gridded population data and country-specific baseline respiratory hospital admission rates. Times-series of temperatures are simulated with a regional climate model based on four global climate models, under two greenhouse gas emission scenarios- (A1B & A2).

Between a reference period (1981–2010) and a future period (2021–2050), the total number of respiratory hospital admissions attributed to heat is projected to be larger in Southern Europe, with three-times more heat attributed respiratory hospital admissions in the future period. The smallest change was estimated in Eastern Europe with about a two-fold increase. For all of Europe, the number of respiratory heat-related hospital admissions is projected to be 26,000 annually in the future period compared with 11,000 in the reference period.

The results suggest that projected effects of climate change on temperature and the number of extreme heat events could substantially influence respiratory morbidity across Europe.

## INTRODUCTION

Respiratory diseases are ranked second in Europe in terms of mortality, prevalence and costs.<sup>1</sup> This burden is expected to increase, partly due to a changing climate.<sup>2</sup> An environmental factor with a large impact on mortality and morbidity in Europe is extreme heat, with large effects on respiratory diseases.<sup>3-5</sup> Physiological effects of exposure to heat can be directly heat related (heat stroke, heat fatigue and dehydration) or can contribute to worsening of respiratory and cardiovascular diseases, electrolyte disorders, and kidney problems.<sup>4-7</sup> The reasons for an increase in respiratory admissions may be several. Elderly with respiratory diseases such as COPD are less fit and suffer often from circulatory problems. Heat influenced admissions due to chronic airway obstruction and asthma increased more than admissions due to chronic bronchitis in a study from New York City,<sup>8</sup> but the daily number of admissions seldom allow a study of specific diagnoses. In a recent expert elicitation amongst European researchers engaged in environmental medicine or respiratory health, extreme heat stood out as most important climate related pathway to adverse impacts on respiratory health, more important than changes in air pollutants and allergens.<sup>9</sup> A review found that heatwaves have a stronger relative impact on mortality than on emergency room visits and hospital admissions, suggesting that many individuals die before they can get to the hospital.<sup>8,10</sup> However, several studies confirm that heat also affects health care utilisation.<sup>3, 9,11</sup> During the heatwave of 2003 in France, the Assistance Public Hôpitaux de Paris recorded 2,400 additional visits to the emergency care units and 1,900 additional hospital admissions.<sup>4,12</sup> During the heatwave in California in 2006 there were almost 1,200 hospital admissions together with more than 16,000 visits to the emergency departments.<sup>6</sup>

It is possible that hospital admissions could increase in the future due to temperature changes projected with climate change, assuming no additional acclimatisation. Projected changes include an increase in global mean temperature of 1.8°C to 4.0°C by the end of this century, with larger increases over land areas at high latitudes, changing seasonal temperatures, and increases in the frequency, intensity, duration, and spatial extent of heatwaves.<sup>4,13</sup> Recent projections for 2070–2100



1  
2  
3  
4  
5  
6  
7 suggest that maximum temperatures experienced once every 20 years during the period 1961–1990  
8 could be expected as often as every year in southern Europe and every 3rd-5th year in northern  
9 Europe.<sup>4214</sup> This means that Europe should expect an increase in both mean temperatures and the  
10 number of extreme heat events. Recent heatwaves are consistent with projections. For example, the  
11 heatwave that occurred in Europe 2003 could be expected to return every 46,000 years, based on  
12 the temperature distribution for the years 1864–2000.<sup>4215</sup> However, such extreme hot conditions  
13 may become ~~normal~~ much more common in the end of this century due to anthropogenic climate  
14 changes.<sup>4416</sup> The uncertainty in this estimated return time is quite high, with a lower bound of the  
15 90% confidence interval of 9,000 years. Even so, another heatwave occurred in 2006 with the most  
16 anomalous July temperature ever measured in Europe.<sup>4517</sup> In 2010, Eastern Europe experienced a  
17 heatwave with summer temperatures higher than the last 140 years, resulting in roughly 55,000  
18 excess deaths in Russia.<sup>4618</sup>

19  
20  
21  
22  
23  
24  
25  
26  
27  
28  
29  
30 The possible impacts of these changes ~~in~~ on morbidity, particularly respiratory health, are relatively  
31 unexplored.  
32  
33

### 34 35 **Aim**

36  
37 The aim of this study is to assess the extent to which changes in the frequency of hot days due to  
38 climate change over the next 40 years could affect heat related respiratory hospital admissions  
39 (RHAs) in Europe. Using a range of climate projections, we estimate the change in hospital  
40 admissions between a reference period and a future period.  
41  
42  
43  
44  
45

## 46 47 **METHODS**

### 48 49 **Climate change and temperature modelling**

50  
51 The Rossby Centre regional atmospheric climate model ~~RCA3~~<sup>47</sup> RCA3<sup>19</sup> was developed by SMHI  
52 (Swedish meteorological and hydrological institute) to dynamically downscale results from the global  
53 climate models ~~CCSM3~~<sup>18</sup>, ~~ECHAM5~~<sup>49</sup>, ~~HadleyCM3~~<sup>20</sup> and ~~ECHAM4~~<sup>21</sup> CCSM3<sup>20</sup>, ECHAM5<sup>21</sup>, HadleyCM3<sup>22</sup>  
54  
55  
56  
57  
58  
59  
60

1  
2  
3  
4  
5  
6  
7  
8  
9  
10  
11  
12  
13  
14  
15  
16  
17  
18  
19  
20  
21  
22  
23  
24  
25  
26  
27  
28  
29  
30  
31  
32  
33  
34  
35  
36  
37  
38  
39  
40  
41  
42  
43  
44  
45  
46  
47  
48  
49  
50  
51  
52  
53  
54  
55  
56  
57  
58  
59  
60

and ECHAM4<sup>23</sup> to a higher resolution over Europe. RCA3 is run on a horizontal grid spacing of 0.44° (corresponding to approximately 50 km) and a time step of 30 minutes. Projections are based on the global greenhouse gas emission scenarios A1B and A2 (scenarios are described in detail in the SRES<sup>22</sup>SRES<sup>24</sup>). Both have been used in climate change health impact assessments (HIA).<sup>23-26,25-28</sup> A1B is a “middle of the road” scenario and A2 is considered a high emission scenario, although recent greenhouse gas emissions have been higher. Data from one climate model, under one climate change scenario, is referred to as one climate change projection.

We use aggregated daily projections of maximum temperature and relative humidity data to estimate exposure for the periods 1981–2021~~2020~~ (reference period) and 2021–2050 (future period).

### Population and morbidity rates

The annual country specific rate of respiratory hospital admissions between 2005 and 2010 were extracted from the WHO’s European Health for All Database (<http://data.euro.who.int/hfad>) for the EU27 countries. The mean value over the six years was used as a baseline morbidity rate. Official population data were from the HYDE theme within the Netherlands Environmental Assessment Agency.<sup>27,29</sup> These data are gridded on a 0.0833° resolution (approximately 9,45km) and matched with the climatic data by summing the population within each climatic grid cell.

### Exposure-response assumption

The impact calculations were based on the ~~heat morbidity~~ relationship [between heat and RHAs \(ICD-9:460–519\)](#) estimated within the European PHEWE [\(Assessment and Prevention of Acute Health Effects of Weather Conditions in Europe\)](#) project.<sup>3</sup> This relationship was based on analyses of 12 European cities over the 1990s, using the daily maximum of apparent temperature (AT), where AT is a combination of the measured temperature and the dew point temperature:

$$AT = -2.653 + 0.944 * T + 0.0153 * (DT)^2$$

1  
2  
3  
4  
5  
6  
7 where T is the air temperature and DP the dew point temperature, which can be derived from  
8 temperature and relative humidity.<sup>28,30</sup> The AT accounts for heat stress related not only to the  
9 absolute temperature but also to the saturation of the surrounding air that makes it harder to  
10 regulate body temperature by sweating, the most important mechanism to maintain a healthy body  
11 temperature.<sup>29-30</sup> ~~The PHEWE~~<sup>31 32</sup> The PHEWE model also included potential confounders such as air  
12 pollution, holidays, week days etc. The study used a 0–3 day lag of the maximum AT and concluded  
13 that the 90th percentile of this exposure variable for the summer months, April to September, is the  
14 appropriate threshold value for the heat-morbidity function.<sup>3</sup> We calculated the 90th percentile for  
15 the summer months for each grid cell from the climate data for the 1990s, yielding individual  
16 thresholds for each grid cell for each climate projection.  
17  
18  
19  
20  
21  
22  
23  
24

25  
26 The PHEWE study calculated the relative risk (RR) coefficients for each of the 12 cities and then  
27 combined these into two meta-coefficients, for North-Continental cities 1.012 (95% CI 1.001–1.022)  
28 and Mediterranean cities 1.021 (95% CI 1.006–1.036), associated with a 1-degree increase above the  
29 temperature threshold. Meta-coefficients were more suitable as they allowed calculation of the  
30 change in RHAs for countries with and without a city in the PHEWE Study. We assigned the  
31 Mediterranean coefficient to Portugal and the Mediterranean countries. The rest of Europe was  
32 assigned the RR for the North continental cities. Statistically significant coefficients were found for all  
33 ages and age 75+ in the PHEWE study. Because the population data were not stratified by age, we  
34 used the PHEWE study coefficients for all ages.  
35  
36  
37  
38  
39  
40  
41  
42  
43

## 44 Projections

45 The final data used in the impact calculations were based on the climate data grid with a resolution  
46 of 0.44° resulting in 8,075 grid cells over Europe. The population data, RR coefficients and baseline  
47 morbidity rates were projected for each grid cell. ~~In addition,~~ The countries within EU27 were  
48 grouped into four regions, Northern, Western, Eastern and Southern Europe, according to the United  
49 Nations classification scheme (<http://unstats.un.org/unsd/methods/m49/m49regin.htm#europe>).  
50  
51  
52  
53  
54  
55  
56  
57  
58  
59  
60

1  
2  
3  
4  
5  
6  
7  
8  
9  
10  
11  
12  
13  
14  
15  
16  
17  
18  
19  
20  
21  
22  
23  
24  
25  
26  
27  
28  
29  
30  
31  
32  
33  
34  
35  
36  
37  
38  
39  
40  
41  
42  
43  
44  
45  
46  
47  
48  
49  
50  
51  
52  
53  
54  
55  
56  
57  
58  
59  
60

Thus, each grid cell includes (1) a daily time-series of 0–3 day lag maximum AT for each climate change projection; (2) a grid cell specific temperature morbidity threshold and a location-based RR coefficient; and (3) population. For each grid cell, the AT was compared to the specific threshold for each day in the two time periods and risk estimates were calculated for each day. The expected number of daily RHAs in each cell was calculated using the population and the expected daily number of RHAs per capita, based on the national average of the grid cell.

$$RHA_{i,t} = RR_i^{(AT_{i,t} - Thres)_+} * Pop_i * RHAp_c$$

where  $RHA_{i,t}$  is the number of RHAs attributable to heat in grid cell  $i$  at time  $t$ ,  $RR_i$  the RR coefficient in grid cell  $i$ ,  $(AT_{i,t} - Thres)_+$  the **positive** difference between the 0–3 lag AT and the threshold for grid cell  $i$  at time  $t$  **if  $AT_{i,t}$  were greater than the threshold and 0 otherwise**,  $Pop_i$  and  $RHAp_c$  the population and expected number RHAs per capita in grid cell  $i$ .

For each country, the estimated number of RHAs attributed to heat was calculated for each climate change projection, for both the reference and the future period. The estimated number of RHAs attributed to heat was then transformed into the proportion of the expected annual number RHAs for each country (data available from the authors). Mean estimates were calculated for each region for each climate change projection.

### Sensitivity analysis

Because the study results could heavily depend on the RR coefficients and thresholds used, we assess whether the estimates appeared sensitive to the region-specific meta-coefficients. We investigated the grids that contained the cities in the PHEWE study using both the location (Mediterranean or North-Continental) and city specific RR coefficients.<sup>3</sup> We then compared the results with respect to the attributed proportion of RHAs and the proportional change in heat related RHAs.

## RESULTS

The periods of warm days will increase in the future. For the cities included in the sensitivity analysis, the temperature threshold was exceeded by 20 days in the baseline period and 40 days in the future period, on average each year.

In the future period approximately 0.4% of the annual numbers of RHAs in Europe was estimated to be due to heat (Table 1), based on the mean estimates over the climate change projections. In absolute terms, assuming all else equal, this represents about 26,000 cases annually in Europe. This should be compared to the reference period where approximately 0.18% of all RHAs were attributed to heat or about 11,000 cases annually. Thus, the results suggest more than a relative doubling of the RHAs attributed to heat in Europe.

**Table 1.** The estimated proportion of RHAs attributed to heat for each region. Intervals describe the highest and lowest estimate in each region

| Region          | 1981–2010             | 2021–2050             | Change                |
|-----------------|-----------------------|-----------------------|-----------------------|
| Eastern Europe  | 0.17% (0.16% – 0.19%) | 0.31% (0.29% – 0.35%) | 0.14% (0.11% – 0.17%) |
| Northern Europe | 0.13% (0.10% – 0.15%) | 0.27% (0.19% – 0.32%) | 0.14% (0.07% – 0.17%) |
| Southern Europe | 0.23% (0.18% – 0.26%) | 0.64% (0.42% – 0.68%) | 0.41% (0.23% – 0.44%) |
| Western Europe  | 0.18% (0.16% – 0.20%) | 0.39% (0.34% – 0.45%) | 0.21% (0.17% – 0.26%) |
| EU27            | 0.18% (0.10% – 0.26%) | 0.40% (0.19% – 0.68%) | 0.21% (0.07% – 0.44%) |

On the regional level, the five projections estimate increases in the number of heat related RHAs for Europe (Table 2). However, in one climate change projection, The Czech Republic, Hungary, Poland and Slovakia were estimated to have a decrease in heat related RHAs (Fig 1). The countries with the highest estimated increase also show the largest range between the highest and lowest estimate. The Scandinavian and Baltic countries show the smallest range between the highest and lowest estimates along with small increases of the mean estimates.

1  
2  
3  
4  
5  
6  
7  
8  
9  
10  
11  
12  
13  
14  
15  
16  
17  
18  
19  
20  
21  
22  
23  
24  
25  
26  
27  
28  
29  
30  
31  
32  
33  
34  
35  
36  
37  
38  
39  
40  
41  
42  
43  
44  
45  
46  
47  
48  
49  
50  
51  
52  
53  
54  
55  
56  
57  
58  
59  
60

**Table 2.** Future increase in heat related RHAs based on the four climate models, under two emission scenarios, as the proportionpercentage of the annual expected number of RHAs in each region

| Climate model                  | CCSM3      | ECHAM5 | HadCM3    | ECHAM4 | ECHAM5 |
|--------------------------------|------------|--------|-----------|--------|--------|
| <i>Greenhouse gas scenario</i> | <i>A1B</i> |        | <i>A2</i> |        |        |
| Eastern Europe                 | 0.32%      | 0.08%  | 0.18%     | 0.12%  | 0.01%  |
| Northern Europe                | 0.17%      | 0.09%  | 0.14%     | 0.20%  | 0.08%  |
| Southern Europe                | 0.51%      | 0.29%  | 0.64%     | 0.45%  | 0.14%  |
| Western Europe                 | 0.30%      | 0.11%  | 0.26%     | 0.29%  | 0.06%  |
| EU27                           | 0.32%      | 0.13%  | 0.29%     | 0.26%  | 0.07%  |

There is variation among countries, with the largest increases in the Southern European countries and the smallest increase in Eastern Europe (Table 2). The relative change in the burden of RHA's in relation to the climate change scenarios investigated indicate a larger relative increase in Mediterranean countries (approximately three times) compared to Northern European countries (approximately two times).

### Sensitivity analysis

The calculations using the city specific RR coefficients yielded a different proportion and number of estimated RHAs than the ones using the two meta-coefficients, as expected. However, the relative changes in the number of hospital admissions attributed to heat between the two time-periods were not affected by the change of the RR coefficients.

### DISCUSSION

The analysis estimates that the number of RHAs will increase in a warmer climate with more hot days. Heat related RHAs were projected to increase two- to three-fold in the future due to climate change. However, the proportion of respiratory admissions attributed to heat would remain rather small. This projection is in line with the results of a recent study which estimates that the respiratory

1  
2  
3  
4  
5  
6  
7 [admissions due to excessive heat in New York State will increase 2-6 times from the period 1991-](#)  
8 [2004 to the period 2080-2099.](#)<sup>33</sup>  
9

10  
11 As most heat related health outcomes occur during the warmest period of the year, presenting the  
12 increase as a change in the proportion of the total number of annual RHAs can underestimate the  
13 additional burden on the health care system during summer. As the threshold was exceeded for  
14 approximately 40 days in one year, an annual increase of 0.21% would result in a 1.9% increase on  
15 average during these 40 days. The annual numbers are used because the available baseline rates of  
16 RHAs are expressed as an annual average. Applying results to sub-national scales could be  
17 inappropriate because national averages summarize over considerable heterogeneity.  
18  
19

20  
21 The results suggest a larger impact from heat in Southern Europe in the future period, centred on  
22 year 2035, than in the eastern and northern parts. This is in line with many climate change  
23 projections showing a larger relative increase in the number of extremely hot days in southern  
24 Europe compared with northern Europe.<sup>1214</sup> However, to some extent this might also be explained by  
25 model bias for northern Europe introduced by the RCA3 model, where the model appears to  
26 underestimate temperature for the warmest days.<sup>1719</sup> This temperature bias is present in the  
27 reference period, future period, and threshold values; therefore, the estimated numbers of RHAs  
28 from the two periods within each scenario are comparable, but comparisons within the same time-  
29 period, across scenarios may be inaccurate.  
30  
31

32  
33 As the estimates are based on the population size in each grid cell, the added burden will be larger in  
34 countries with larger increases in temperatures in densely populated areas. Because the population  
35 of a city is considered a good predictor of the size of the urban heat island,<sup>3434</sup> an increase in the  
36 population living in urban [areas](#) will increase the numbers exposed and the temperature to which  
37 they are exposed. Heat islands increase temperatures in urbanized areas compared to surrounding  
38 areas, also reducing cooling during the night time.<sup>2235</sup> These factors combined are likely to magnify  
39 the health burden during a heatwave.<sup>2236</sup> The coarse spatial scale of the climate models makes them  
40  
41  
42  
43  
44  
45  
46  
47  
48  
49  
50  
51  
52  
53  
54  
55  
56  
57  
58  
59  
60

1  
2  
3  
4  
5  
6  
7 unable to take the urban heat island effect into account. Together with the urbanization of Europe,  
8 this could potentially result in underestimation of actual consequences/RHAs in the future period  
9 because the same population size and composition were assumed in both periods. In addition,  
10 climate change is likely to increase ozone concentrations that would add an additional health burden  
11  
12  
13  
14 ~~to~~for people at risk of respiratory diseases. The number of deaths and RHAs, due to a change in  
15 ozone, is expected to change in the future. <sup>34,37</sup> A sensitivity analysis in the PHEWE study however  
16 showed that the exposure-response relationship for heat did not substantially differ between models  
17 taking ozone into account and models adjusting for NO<sub>2</sub> alone.<sup>3</sup>

22 We used the same thresholds for the reference and future period to isolate the effect of climate  
23 change. This would tend to overestimate the increased impact because there will undoubtedly be  
24 biological and/or social adaptations that will reduce future health temperature-related burdens.  
25  
26 However, given the uncertainty of such adaptation effects, we choose to not incorporate such effects  
27  
28 in the projections. ~~Studies from~~Recent studies in the U.S ~~show that they~~indicate heat related health  
29  
30 burdens have decreased ~~over the last 50 years,~~<sup>35, 38</sup> indicating that some adaptation is taking place.  
31  
32 An opposite trend appears to be occurring in Stockholm, with an increase of the risk of mortality  
33 associated with heat during the 1990s. <sup>36,39</sup> A study looking at the impact of heat on mortality, before  
34 and after the implementation of a heat warning system, in Italy shows that the effects of extreme  
35 heat can be reduced while the effects of moderate increased average temperatures remains  
36 similar.<sup>40</sup> The magnitude and the extent of future adaptation is, of course, highly uncertain, and will  
37  
38 vary between and within countries. Nevertheless, cities with higher thresholds seem to have higher  
39  
40 risk ratio coefficients.<sup>3, 37,41</sup> In an effort to estimate future and presumably higher thresholds, one  
41  
42 must also adjust the risk ratio coefficients. This would result in fewer days of elevated risk, but the  
43  
44 risk increase on each occasion could be higher due to the higher RRs.

51 Table 1 shows how the results vary by global climate models and greenhouse gas scenarios. This  
52 study exemplifies the magnitude of the difference between projections made by a model with  
53  
54  
55  
56  
57  
58  
59  
60



1  
2  
3  
4  
5  
6 different initial conditions and between different models with the same initial conditions. The results  
7  
8 indicate the range of these estimates is large. The mean increase over the five projections however,  
9  
10 provides confidence that the number of RHAs will increase over Europe as the climate continues to  
11  
12 change.

13  
14  
15 To improve the estimates of the impacts of heat ~~of~~ RHAs, detailed data on emergency room visits  
16  
17 and admissions during summer are needed, such as the proportion of emergency department cases  
18  
19 admitted to hospital, and the fatality rate. A better understanding of vulnerable groups is needed,  
20  
21 including how these groups could change over time. For example, the portion of the population aged  
22  
23 over 65 will increase from 17 to 29%<sup>38,42</sup> by 2050, significantly increasing the size of this vulnerable  
24  
25 group. COPD is mainly a disease of the elderly. Persons suffering from COPD appear especially  
26  
27 vulnerable to heat<sup>43</sup> and the incidence of COPD is likely to increase<sup>44</sup> with the consequence that the  
28  
29 health impacts of heat may increase in future years. This study was limited to estimating the impacts  
30  
31 on the total population because few age-specific relationship were reported and because age  
32  
33 stratified data were only available on a coarser spatial scale than the climate data, which would  
34  
35 reduce the benefits of having spatial climate data.

36  
37 Normal weather patterns in the future will be different than those of today, both for average  
38  
39 temperature and extreme weather events. As the number of heat related RHAs are expected to  
40  
41 increase on the sub-continental scale, additional national or regional projections of the future health  
42  
43 burden from heat are needed, taking into account possible changes in exposure and vulnerability.

## 44 45 46 **CONCLUSIONS**

47  
48 Projected changes in temperature and the number of extreme heat events with climate change could  
49  
50 substantially influence respiratory morbidity across Europe. Analyses projected that both the future  
51  
52 proportion of annual RHAs attributed to heat and the relative change in heat related RHAs will be  
53  
54 largest in Southern Europe, where they are expected to nearly triple. Eastern Europe can expect the

1  
2  
3  
4  
5  
6  
7  
8  
9  
10  
11  
12  
13  
14  
15  
16  
17  
18  
19  
20  
21  
22  
23  
24  
25  
26  
27  
28  
29  
30  
31  
32  
33  
34  
35  
36  
37  
38  
39  
40  
41  
42  
43  
44  
45  
46  
47  
48  
49  
50  
51  
52  
53  
54  
55  
56  
57  
58  
59  
60

smallest increase in heat related RHAs, where they are estimated to approximately double. For all of Europe, the number of respiratory heat-related hospital admissions is projected to be 26,000 annually in the future period (2021–2050) compared with 11,000 in the reference period (1981–2010). The estimates presented rely on the assumption that no additional adaptation occurs. Future studies should elaborate and quantify the possible effects of different adaptation assumptions applied to regional conditions.

This work was supported by the EU-funded Climate-Trap project (contract EAHC 20081108) and by the Swedish Environmental Protection Agency through the research programme CLEO – Climate Change and Environmental Objectives. We would also like to acknowledge Estonia's Ministry of Education for providing resources to H. Orru with the grant SF0180060s09.

Contribution statement: CÅ, BF, HO has planned and designed the study. GS represented SMHI and provided climate data. CÅ ran the analyses, drafted the first manuscript and is guarantor. All authors have participated in the interpretation of results and revised the manuscript.

The specific estimates for each of the EU27 countries, for each of the climate projections is available after contact with corresponding author.

## REFERENCES

1. Loddenkemper R, Gibson G, Sibille Y. European lung white book. *European Respiratory Society/European Lung Foundation, Sheffield, UK, ERSJ* 2003:1-182.
2. Ayres JG, Forsberg B, Annesi-Maesano I, et al. Climate change and respiratory disease: European Respiratory Society position statement. *Eur Respir J* 2009;34(2):295-302.
3. Michelozzi P, Accetta G, De Sario M, et al. High temperature and hospitalizations for cardiovascular and respiratory causes in 12 European cities. *Am J Respir Crit Care Med* 2009;179(5):383-9.
4. [Rocklöv J, Forsberg B. Comparing approaches for studying the effects of climate extremes - a case study of hospital admissions in Sweden during an extremely warm summer. \*Glob Health Action\* 2009;2.](#)
5. Kovats RS, Hajat S. Heat stress and public health: a critical review. *Annu Rev Public Health* 2008;29:41-55.
6. Knowlton K, Rotkin-Ellman M, King G, et al. The 2006 California heat wave: impacts on hospitalizations and emergency department visits. *Environ Health Perspect* 2009;117(1):61-7.
7. Rey G, Jouglé E, Fouillet A, et al. The impact of major heat waves on all-cause and cause-specific mortality in France from 1971 to 2003. *Int Arch Occup Environ Health* 2007;80(7):615-26.
8. [Lin S, Luo M, Walker RJ, et al. Extreme high temperatures and hospital admissions for respiratory and cardiovascular diseases. \*Epidemiology\* 2009;20\(5\):738-46.](#)
9. [Forsberg B, Braback L, Keune H, et al. An expert assessment on climate change and health - with a European focus on lungs and allergies. \*Environ Health\* 2012;11 Suppl 1:S4.](#)
10. Ye X, Wolff R, Yu W, et al. Ambient Temperature and Morbidity: A Review of Epidemiological Evidence. *Environ Health Perspect* 2011.
11. Semenza JC, McCullough JE, Flanders WD, et al. Excess hospital admissions during the July 1995 heat wave in Chicago. *Am J Prev Med* 1999;16(4):269-77.
12. Dhainaut JF, Claessens YE, Ginsburg C, et al. Unprecedented heat-related deaths during the 2003 heat wave in Paris: consequences on emergency departments. *Crit Care* 2004;8(1):1-2.
13. [IPCC. \*Managing the Risks of Extreme Events and Disasters to Advance Climate Change Adaptation - Summary for Policymakers\*. Geneva, Switzerland: World Meteorological Organization, 2012.](#)
14. [IPCC. \*Climate Change 2007 - The Physical Science Basis: Working Group I Contribution to the Fourth Assessment Report of the IPCC\*. Cambridge, UK and New York, NY, USA: Cambridge University Press, 2007.](#)
15. Nikulin G, Kjellström E, Hansson ULF, et al. Evaluation and future projections of temperature, precipitation and wind extremes over Europe in an ensemble of regional climate simulations. *Tellus A* 2011;63(1):41-55.
16. [Schar C, Vidale PL, Luthi D, et al. The role of increasing temperature variability in European summer heatwaves. \*Nature\* 2004;427\(6972\):332-6.](#)
17. [Stott PA, Stone DA, Allen MR. Human contribution to the European heatwave of 2003 \(vol 432, pg 610, 2004\). \*Nature\* 2005;436\(7054\):1200-002004;432\(7017\):610-4.](#)
18. Rebetez M, Dupont O, Giroud M. An analysis of the July 2006 heatwave extent in Europe compared to the record year of 2003. *Theoretical and Applied Climatology* 2009;95(1):1-7.
19. Barriopedro D, Fischer EM, Luterbacher J, et al. The Hot Summer of 2010: Redrawing the Temperature Record Map of Europe. *Science* 2011.
20. Samuelsson P, Jones CG, Willen U, et al. The Rossby Centre Regional Climate model RCA3: model description and performance. *Tellus Series a-Dynamic Meteorology and Oceanography* 2011;63(1):4-23.
21. [Collins WD, Bitz CM, Blackmon ML, et al. The Community Climate System Model version 3 \(CCSM3\). \*J Climate\* 2006;19\(11\):2122-43.](#)
22. [Roeckner E, Bäuml G, Bonaventura L, et al. The atmospheric general circulation model ECHAM 5. PART I: Model description. Hamburg, Germany: MPI für Meteorologie, 2003.](#)

Formatted: Swedish (Sweden)

Formatted: Swedish (Sweden)

1  
2  
3  
4  
5  
6  
7  
8  
9  
10  
11  
12  
13  
14  
15  
16  
17  
18  
19  
20  
21  
22  
23  
24  
25  
26  
27  
28  
29  
30  
31  
32  
33  
34  
35  
36  
37  
38  
39  
40  
41  
42  
43  
44  
45  
46  
47  
48  
49  
50  
51  
52  
53  
54  
55  
56  
57  
58  
59  
60

2022. Johns TC, Durman CF, Banks HT, et al. The new Hadley Centre Climate Model (HadGEM1): Evaluation of coupled simulations. *J Climate* 2006;19(7):1327-53.
2123. Roeckner E, Arpe K, Bengtsson, et al. The atmospheric general circulation model {ECHAM-}4: ~~Model~~{M}odel description and simulation of present-day climate, 1996:103-23.
2224. Nakicenovic N, Alcamo J, Davis G, et al. Special report on emissions scenarios: a special report of Working Group III of the Intergovernmental Panel on Climate Change: Pacific Northwest National Laboratory, Richland, WA (US), Environmental Molecular Sciences Laboratory (US), 2000.
2325. Ballester J, Robine JM, Herrmann FR, et al. Long-term projections and acclimatization scenarios of temperature-related mortality in Europe. *Nat Commun* 2011;2:358.
2426. Knowlton K, Lynn B, Goldberg RA, et al. Projecting heat-related mortality impacts under a changing climate in the New York City region. *American Journal of Public Health* 2007;97(11):2028-34.
2527. Baccini M, Kosatsky T, Analitis A, et al. Impact of heat on mortality in 15 European cities: attributable deaths under different weather scenarios. *J Epidemiol Community Health* 2011;65(1):64-70.
2628. Beguin A, Hales S, Rocklov J, et al. The opposing effects of climate change and socio-economic development on the global distribution of malaria. *Global Environmental Change-Human and Policy Dimensions* 2011;21(4):1209-14.
2729. Goldewijk KK, Beusen A, Janssen P. Long-term dynamic modeling of global population and built-up area in a spatially explicit way: HYDE 3.1. *Holocene* 2010;20(4):565-73.
2830. Lawrence MG. The Relationship between Relative Humidity and the Dewpoint Temperature in Moist Air: A Simple Conversion and Applications. *Bulletin of the American Meteorological Society* 2005;86(2):225-33.
2931. Parsons KC. *Human thermal environments: the effects of hot, moderate, and cold environments on human health, comfort, and performance*: Taylor & Francis, 2003.
3032. Steadman RG. A Universal Scale of Apparent Temperature. *J Clim Appl Meteorol* 1984;23(12):1674-87.
3133. [Lin S, Hsu WH, Van Zutphen AR, et al. Excessive heat and respiratory hospitalizations in new york state: estimating current and future public health burden related to climate change. \*Environ Health Perspect\* 2012;120\(11\):1571-7.](#)
3234. Oke TR. City size and the urban heat island. *Atmospheric Environment (1967)* 1973;7(8):769-79.
3335. Holmer B, Thorsson S, Eliasson I. COOLING RATES, SKY VIEW FACTORS AND THE DEVELOPMENT OF INTRA - URBAN AIR TEMPERATURE DIFFERENCES. *Geografiska Annaler: Series A, Physical Geography* 2007;89(4):237-48.
3436. Nicholls N, Skinner C, Loughnan M, et al. A simple heat alert system for Melbourne, Australia. *Int J Biometeorol* 2008;52(5):375-84.
3537. Orru H, Andersson C, Ebi KL, et al. Impact of climate change on ozone related mortality and morbidity in Europe ~~(Accepted)~~. *Eur Respir J* 2012. Jun 27. [Epub ahead of print].
3638. Davis RE, Knappenberger PC, Michaels PJ, et al. Changing heat-related mortality in the United States. *Environmental Health Perspectives* 2003;111(14):1712-18.
3739. Rocklov J, Forsberg B, Meister K. Winter mortality modifies the heat-mortality association the following summer. *Eur Respir J* 2009;33(2):245-51.
3840. [Schifano P, Leone M, De Sario M, et al. Changes in the effects of heat on mortality among the elderly from 1998-2010: results from a multicenter time series study in Italy. \*Environmental Health\* 2012;11\(1\):58.](#)
3941. Baccini M, Biggeri A, Accetta G, et al. Heat effects on mortality in 15 European cities. *Epidemiology* 2008;19(5):711-9.
4042. Giannakouris K. Ageing characterises the demographic perspectives of the European societies. *Statistics in focus* 2008;72:2008.
4143. Schwartz J. Who is sensitive to extremes of temperature? A case-only analysis. *Epidemiology* 2005;16(1):67-72.

Formatted: Swedish (Sweden)

Formatted: Swedish (Sweden)

Formatted: Swedish (Sweden)

1  
2  
3  
4  
5  
6  
7 [44. Mannino DM, Buist AS. Global burden of COPD: risk factors, prevalence, and future trends. \*Lancet\*](#)  
8 [2007;370\(9589\):765-73.](#)  
9  
10  
11  
12  
13  
14  
15  
16  
17  
18  
19  
20  
21  
22  
23  
24  
25  
26  
27  
28  
29  
30  
31  
32  
33  
34  
35  
36  
37  
38  
39  
40  
41  
42  
43  
44  
45  
46  
47  
48  
49  
50  
51  
52  
53  
54  
55  
56  
57  
58  
59  
60

1  
2  
3  
4  
5  
6  
7  
8  
9  
10  
11  
12  
13  
14  
15  
16  
17  
18  
19  
20  
21  
22  
23  
24  
25  
26  
27  
28  
29  
30  
31  
32  
33  
34  
35  
36  
37  
38  
39  
40  
41  
42  
43  
44  
45  
46  
47  
48  
49  
50  
51  
52  
53  
54  
55  
56  
57  
58  
59  
60

Figure 1. The range of the absolute increase in RHAs attributed to heat between the two periods (1981-2010, 2021-2050) as proportion the annual expected number of RHAs for each of the 27 countries. The points show the highest and lowest estimate from four climate models under two emission scenarios.

For peer review only

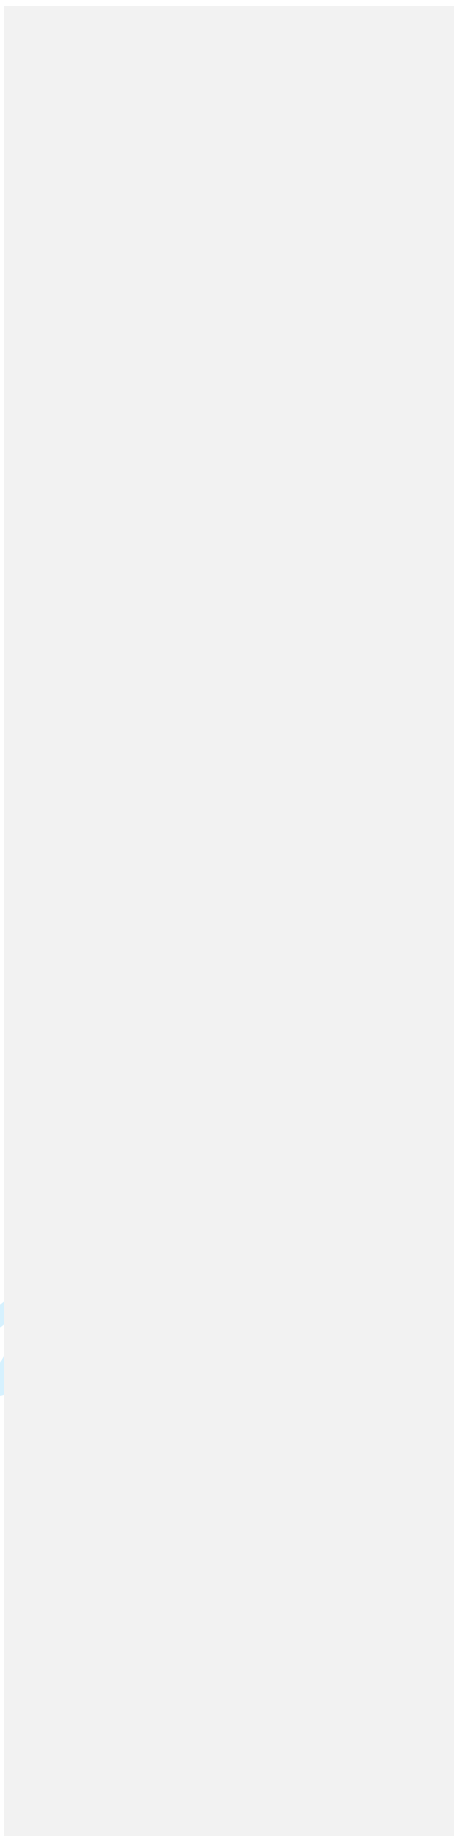

1  
2  
3  
4  
5  
6  
7  
8  
9  
10  
11  
12  
13  
14  
15  
16  
17  
18  
19  
20  
21  
22  
23  
24  
25  
26  
27  
28  
29  
30  
31  
32  
33  
34  
35  
36  
37  
38  
39  
40  
41  
42  
43  
44  
45  
46  
47  
48  
49  
50  
51  
52  
53  
54  
55  
56  
57  
58  
59  
60

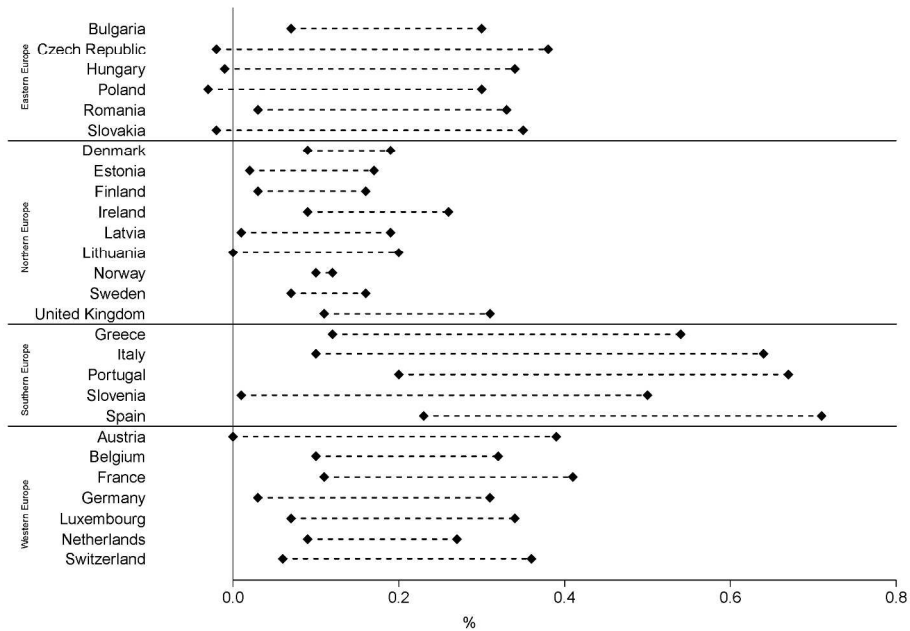

406x279mm (200 x 200 DPI)

view only



## Heat related respiratory hospital admissions in Europe in a changing climate: A health impact assessment

|                                 |                                                                                                                                                                                                                                                                                                                                                                                                               |
|---------------------------------|---------------------------------------------------------------------------------------------------------------------------------------------------------------------------------------------------------------------------------------------------------------------------------------------------------------------------------------------------------------------------------------------------------------|
| Journal:                        | <i>BMJ Open</i>                                                                                                                                                                                                                                                                                                                                                                                               |
| Manuscript ID:                  | bmjopen-2012-001842.R2                                                                                                                                                                                                                                                                                                                                                                                        |
| Article Type:                   | Research                                                                                                                                                                                                                                                                                                                                                                                                      |
| Date Submitted by the Author:   | 20-Dec-2012                                                                                                                                                                                                                                                                                                                                                                                                   |
| Complete List of Authors:       | Åström, Christofer; Umeå University, Department of Public Health and Clinical Medicine<br>Orru, Hans<br>Rocklöv, Joacim; Umeå University, Department of Public Health and Clinical Medicine<br>Strandberg, Gustav; Swedish Meteorological and Hydrological Institute,<br>Ebi, Kristie; Stanford University, ClimAdapt<br>Forsberg, Bertil; Umeå University, Department of Public Health and Clinical Medicine |
| <b>Primary Subject Heading</b>: | Epidemiology                                                                                                                                                                                                                                                                                                                                                                                                  |
| Secondary Subject Heading:      | Epidemiology, Occupational and environmental medicine                                                                                                                                                                                                                                                                                                                                                         |
| Keywords:                       | EPIDEMIOLOGY, PUBLIC HEALTH, Epidemiology < THORACIC MEDICINE                                                                                                                                                                                                                                                                                                                                                 |
|                                 |                                                                                                                                                                                                                                                                                                                                                                                                               |

SCHOLARONE™  
Manuscripts



# Heat related respiratory hospital admissions in Europe in a changing climate

## Authors:

Christofer Åström<sup>1\*</sup>, Hans Orru<sup>1,2</sup>, Joacim Rocklöv<sup>1,3</sup>, Gustav Strandberg<sup>4</sup>, Kristie L. Ebi<sup>5</sup>, Bertil Forsberg<sup>1</sup>

## Affiliations:

<sup>1</sup> Department of Public Health and Clinical Medicine, Occupational and Environmental Medicine, Umeå University, Umeå, Sweden; <sup>2</sup> Department of Public Health, University of Tartu, Tartu, Estonia; <sup>3</sup> Department of Public Health and Clinical Medicine, Epidemiology and Global Health, Umeå University, Umeå, Sweden; <sup>4</sup> Swedish Meteorological and Hydrological Institute, Norrköping, Sweden; <sup>5</sup> ClimAdapt, Stanford University, Los Altos, California, USA

## Corresponding author:

\* Author to whom correspondence should be addressed:

Christofer Åström,

Occupational and Environmental Medicine, Department of Public Health and Clinical Medicine, Umeå University, SE 901 87, Sweden

+4690 785 0874

[christofer.astrom@envmed.umu.se](mailto:christofer.astrom@envmed.umu.se)

**Keywords:** Climate change, respiratory health, public health, heat

**Word count:** 3246

## ARTICLE SUMMARY

## Article focus

To assess how heat-related respiratory hospital admissions in Europe could change with increasing temperatures in the near future. Within a range of climate change projections, explore different impact estimates.

## Key messages

The 30-year mean annual increase in heat-related respiratory hospital admissions between the periods 1981-2010 and 2021-2050 can be counted in the 10's of thousands because of projected temperature increases. The increase will be different in different parts of Europe with the largest relative increase in Southern Europe.

## Strengths and limitations

The study takes the spatial variation in climate and population density into account in impact calculations, making the estimates valid for countries with large national differences in these factors.

The study results exemplify some the variation of impacts under different climate change scenarios, as well as the variations within one scenario depending on the underlying climate model.

The use of spatial population data limited the study to exploring the change in all age respiratory hospital for studying heat-related illness, combined with the future increase in the proportion of elderly people, suggests the estimated impacts are likely to be conservative

## ABSTRACT

Objectives: Respiratory diseases are ranked second in Europe in terms of mortality, prevalence and costs. Studies have shown that extreme heat has a large impact on mortality and morbidity, with a large relative increase for respiratory diseases. Expected increases in mean temperature and the number of extreme heat events over the coming decades due to climate change raise questions about the possible health impacts. Here we aim to assess the number of heat related respiratory hospital admissions in a future with a different climate.

Design: A European wide health impact assessment.

Setting: An assessment for each of the EU27 countries.

Methods: Heat-related hospital admissions under a changing climate are projected using multi-city epidemiologic exposure-response relationships applied to gridded population data and country-specific baseline respiratory hospital admission rates. Times-series of temperatures are simulated with a regional climate model based on four global climate models, under two greenhouse gas emission scenarios.

Results: Between a reference period (1981–2010) and a future period (2021–2050), the total number of respiratory hospital admissions attributed to heat is projected to be larger in Southern Europe, with three-times more heat attributed respiratory hospital admissions in the future period. The smallest change was estimated in Eastern Europe with about a two-fold increase. For all of Europe, the number of heat-related respiratory hospital admissions is projected to be 26,000 annually in the future period compared with 11,000 in the reference period.

Conclusions: The results suggest that projected effects of climate change on temperature and the number of extreme heat events could substantially influence respiratory morbidity across Europe.

## INTRODUCTION

Respiratory diseases are ranked second in Europe in terms of mortality, prevalence, and costs.<sup>1</sup> This burden is expected to increase, partly due to a changing climate.<sup>2</sup> An environmental factor with a large impact on mortality and morbidity in Europe is extreme heat, with large effects on respiratory diseases.<sup>3-5</sup> Physiological effects of exposure to heat can be directly heat-related (heat stroke, heat fatigue and dehydration) or can contribute to worsening of respiratory and cardiovascular diseases, electrolyte disorders, and kidney problems.<sup>4-7</sup> The reasons for an increase in respiratory admissions may be several. Elderly with respiratory diseases such as COPD are less fit and suffer often from circulatory problems. Heat influenced admissions due to chronic airway obstruction and asthma increased more than admissions due to chronic bronchitis in a study from New York City,<sup>8</sup> but the daily number of admissions seldom allow a study of specific diagnoses. In a recent expert elicitation amongst European researchers engaged in environmental medicine or respiratory health, extreme heat stood out as most important climate-related pathway to adverse impacts on respiratory health, more important than changes in air pollutants and allergens.<sup>9</sup> A review found that heatwaves have a stronger relative impact on mortality than on emergency room visits and hospital admissions, suggesting that many individuals die before they can get to the hospital.<sup>10</sup> However, several studies confirm that heat also affects health care utilisation.<sup>3,11</sup> During the heatwave of 2003 in France, the Assistance Public Hôpitaux de Paris recorded 2,400 additional visits to the emergency care units and 1,900 additional hospital admissions.<sup>12</sup> During the heatwave in California in 2006 there were almost 1,200 hospital admissions together with more than 16,000 visits to the emergency departments.<sup>6</sup>

It is possible that hospital admissions could increase in the future due to temperature changes projected with climate change, assuming no additional acclimatisation. Projected changes include an increase in global mean temperature of 1.8°C to 4.0°C by the end of this century, with larger increases over land areas at high latitudes, changing seasonal temperatures, and increases in the frequency, intensity, duration, and spatial extent of heatwaves.<sup>13</sup> Recent projections for 2070–2100

1  
2  
3 suggest that maximum temperatures experienced once every 20 years during the period 1961–1990  
4  
5 could be expected as often as every year in southern Europe and every 3rd-5th year in northern  
6  
7 Europe.<sup>14</sup> This means that Europe should expect an increase in both mean temperatures and the  
8  
9 number of extreme heat events. Recent heatwaves are consistent with projections. For example, the  
10  
11 heatwave that occurred in Europe 2003 could be expected to return every 46,000 years, based on  
12  
13 the temperature distribution for the years 1864–2000.<sup>15</sup> However, such extreme hot conditions may  
14  
15 become much more common in the end of this century due to anthropogenic climate changes.<sup>16</sup> The  
16  
17 uncertainty in this estimated return time is quite high, with a lower bound of the 90% confidence  
18  
19 interval of 9,000 years. Even so, another heatwave occurred in 2006 with the most anomalous July  
20  
21 temperature ever measured in Europe.<sup>17</sup> In 2010, Eastern Europe experienced a heatwave with  
22  
23 summer temperatures higher than the last 140 years, resulting in roughly 55,000 excess deaths in  
24  
25 Russia.<sup>18</sup>

26  
27  
28  
29  
30 The possible impacts of these changes on morbidity, particularly respiratory health, are relatively  
31  
32 unexplored.

### 33 34 35 **Aim**

36  
37 The aim of this study is to assess the extent to which changes in the frequency of hot days due to  
38  
39 climate change over the next 40 years could affect heat related respiratory hospital admissions  
40  
41 (RHAs) in Europe. Using a range of climate projections, we estimate the change in hospital  
42  
43 admissions between a reference period and a future period.

## 44 45 46 47 **METHODS**

### 48 49 50 **Climate change and temperature modelling**

51  
52 The Rossby Centre regional atmospheric climate model RCA3<sup>19</sup> was developed by SMHI (Swedish  
53  
54 meteorological and hydrological institute) to dynamically downscale results from the global climate  
55  
56 models CCSM3<sup>20</sup>, ECHAM5<sup>21</sup>, HadleyCM3<sup>22</sup> and ECHAM4<sup>23</sup> to a higher resolution over Europe. RCA3 is  
57  
58  
59  
60

1  
2  
3 run on a horizontal grid spacing of 0.44° (corresponding to approximately 50 km) and a time step of  
4  
5 30 minutes. Projections are based on the global greenhouse gas emission scenarios A1B and A2  
6  
7 (scenarios are described in detail in the SRES<sup>24</sup>). Both have been used in climate change health  
8  
9 impact assessments (HIA).<sup>25-28</sup> A1B is a “middle of the road” scenario and A2 is considered a high  
10  
11 emission scenario, although recent greenhouse gas emissions have been higher. Data from one  
12  
13 climate model, under one climate change scenario, is referred to as one climate change projection.  
14  
15

16  
17 We use aggregated daily projections of maximum temperature and relative humidity data to  
18  
19 estimate exposure for the periods 1981–2020 (reference period) and 2021–2050 (future period).  
20  
21

## 22 **Population and morbidity rates**

23  
24 The annual country specific rate of RHAs (ICD-9:460–519) between 2005 and 2010 were extracted  
25  
26 from the WHO’s European Health for All Database (<http://data.euro.who.int/hfadb>) for the EU27  
27  
28 countries. In the dataset, national hospital admissions data are provided by national public health  
29  
30 institutes, health ministries or corresponding functions. The ICD-9 codes were preferred because the  
31  
32 epidemiological studies in the PHEWE study were based on ICD-9 RHAs. The mean value over the six  
33  
34 years was used as a baseline morbidity rate. In order to have a fine spatial resolution, official  
35  
36 population data were from the HYDE theme within the Netherlands Environmental Assessment  
37  
38 Agency.<sup>29</sup> These data are gridded on a 0.0833° resolution (approximately 9,45km) and matched with  
39  
40 the climatic data by summing the population within each climatic grid cell.  
41  
42  
43  
44

## 45 **Exposure-response assumption**

46  
47 The impact calculations were based on the relationship between heat and RHAs (ICD-9:460–519)  
48  
49 estimated within the European PHEWE (Assessment and Prevention of Acute Health Effects of  
50  
51 Weather Conditions in Europe) project.<sup>3</sup> This relationship was based on analyses of 12 European  
52  
53 cities over the 1990s, using the daily maximum of apparent temperature (AT), where AT is a  
54  
55 combination of the measured temperature and the dew point temperature:  
56  
57  
58  
59  
60

$$AT = -2.653 + 0.944 * T + 0.0153 * (DT)^2$$

where T is the air temperature and DP the dew point temperature, which can be derived from temperature and relative humidity.<sup>30</sup> The AT accounts for heat stress related not only to the absolute temperature but also to the saturation of the surrounding air that makes it harder to regulate body temperature by sweating, the most important mechanism to maintain a healthy body temperature.<sup>31</sup>

<sup>32</sup> The PHEWE model also included potential confounders such as air pollution, holidays, week days etc. The study used a 0–3 day lag of the maximum AT and concluded that the 90th percentile of this exposure variable for the summer months, April to September, is the appropriate threshold value for the heat-morbidity function.<sup>3</sup> We calculated the 90th percentile for the summer months for each grid cell from the climate data for the 1990s, yielding individual thresholds for each grid cell for each climate projection.

The PHEWE study calculated the relative risk (RR) coefficients for each of the 12 cities and then combined these into two meta-coefficients, for North-Continental cities 1.012 (95% CI 1.001–1.022) and Mediterranean cities 1.021 (95% CI 1.006–1.036), associated with a 1-degree increase above the temperature threshold. Meta-coefficients were more suitable as they allowed calculation of the change in RHAs for countries with and without a city in the PHEWE Study. We assigned the Mediterranean coefficient to Portugal and the Mediterranean countries. The rest of Europe was assigned the RR for the North continental cities. Statistically significant coefficients were found for all ages and ages 75+ in the PHEWE study. Because the population data were not stratified by age, we used the PHEWE study coefficients for all ages.

## Projections

The final data used in the impact calculations were based on the climate data grid with a resolution of 0.44° resulting in 8,075 grid cells over Europe. The population data, RR coefficients and baseline morbidity rates were projected for each grid cell. The countries within EU27 were grouped into four

regions, Northern, Western, Eastern and Southern Europe, according to the United Nations classification scheme (<http://unstats.un.org/unsd/methods/m49/m49regin.htm#europe>).

Thus, each grid cell includes (1) a daily time-series of 0–3 day lag maximum AT for each climate change projection; (2) a grid cell specific temperature-morbidity threshold and a location-based RR coefficient; and (3) population. For each grid cell, the AT was compared to the specific threshold for each day in the two time periods and risk estimates were calculated for each day. The expected number of daily RHAs in each cell was calculated using the population and the expected daily number of RHAs per capita, based on the national average of the grid cell.

$$RHA_{i,t} = RR_i^{(AT_{i,t} - Thres_i)_+} * Pop_i * RHApc_i$$

where  $RHA_{i,t}$  is the number of RHAs attributable to heat in grid cell  $i$  at time  $t$ ,  $RR_i$  the RR coefficient in grid cell  $i$ ,  $(AT_{i,t} - Thres_i)_+$  the difference between the 0–3 lag AT and the threshold for grid cell  $i$  at time  $t$  if  $AT_{i,t}$  were greater than the threshold and 0 otherwise,  $Pop_i$  and  $RHApc_i$  the population and expected number RHAs per capita in grid cell  $i$ .

For each country, the estimated number of RHAs attributed to heat was calculated for each climate change projection, for both the reference and the future period. The estimated number of RHAs attributed to heat was then transformed into the proportion of the expected annual number RHAs for each country (data available from the authors). Mean estimates were calculated for each region for each climate change projection.

### Sensitivity analysis

Because the study results could heavily depend on the RR coefficients and thresholds used, we assess whether the estimates appeared sensitive to the region-specific meta-coefficients. We investigated the grids that contained the cities in the PHEWE study using both the location (Mediterranean or North-Continental) and city specific RR coefficients.<sup>3</sup> We then compared the results with respect to the attributed proportion of RHAs and the proportional change in heat related RHAs.



## RESULTS

The periods of warm days will increase in the future. For the cities included in the sensitivity analysis, the temperature threshold was exceeded annually, on average, by 20 days in the baseline period and 40 days in the future period.

In the future period, approximately 0.4% of the annual numbers of RHAs in Europe was estimated to be due to heat (Table 1), based on the mean estimates over the climate change projections. In absolute terms, assuming all else equal, this represents about 26,000 cases annually in Europe. This should be compared to the reference period where approximately 0.18% of all RHAs were attributed to heat or about 11,000 cases annually. Thus, the results suggest more than a relative doubling of the RHAs attributed to heat in Europe.

**Table 1.** The estimated proportion of RHAs attributed to heat for each region. Intervals describe the highest and lowest national estimate in each region

| Region          | 1981–2010             | 2021–2050             | Change                |
|-----------------|-----------------------|-----------------------|-----------------------|
| Eastern Europe  | 0.17% (0.16% – 0.19%) | 0.31% (0.29% – 0.35%) | 0.14% (0.11% – 0.17%) |
| Northern Europe | 0.13% (0.10% – 0.15%) | 0.27% (0.19% – 0.32%) | 0.14% (0.07% – 0.17%) |
| Southern Europe | 0.23% (0.18% – 0.26%) | 0.64% (0.42% – 0.68%) | 0.41% (0.23% – 0.44%) |
| Western Europe  | 0.18% (0.16% – 0.20%) | 0.39% (0.34% – 0.45%) | 0.21% (0.17% – 0.26%) |
| EU27            | 0.18% (0.10% – 0.26%) | 0.40% (0.19% – 0.68%) | 0.21% (0.07% – 0.44%) |

On the regional level, the five projections estimate increases in the number of heat-related RHAs for Europe (Table 2). However, in one climate change projection, The Czech Republic, Hungary, Poland and Slovakia were estimated to have a decrease in heat-related RHAs (Fig 1). The countries with the highest estimated increase also show the largest range between the highest and lowest estimate. The Scandinavian and Baltic countries show the smallest range between the highest and lowest estimates along with small increases of the mean estimates.

**Table 2.** Future increase in heat-related RHAs based on the four climate models, under two emission scenarios, as the percentage of the annual expected number of RHAs in each region

| Climate model                  | CCSM3      | ECHAM5 | HadCM3 | ECHAM4    | ECHAM5 |
|--------------------------------|------------|--------|--------|-----------|--------|
| <i>Greenhouse gas scenario</i> | <i>A1B</i> |        |        | <i>A2</i> |        |
| Eastern Europe                 | 0.32%      | 0.08%  | 0.18%  | 0.12%     | 0.01%  |
| Northern Europe                | 0.17%      | 0.09%  | 0.14%  | 0.20%     | 0.08%  |
| Southern Europe                | 0.51%      | 0.29%  | 0.64%  | 0.45%     | 0.14%  |
| Western Europe                 | 0.30%      | 0.11%  | 0.26%  | 0.29%     | 0.06%  |
| EU27                           | 0.32%      | 0.13%  | 0.29%  | 0.26%     | 0.07%  |

There is variation among countries, with the largest increases in the Southern European countries and the smallest increase in Eastern Europe (Table 2). The relative change in the burden of RHA's in relation to the climate change scenarios investigated indicate a larger relative increase in Mediterranean countries (approximately three times) compared to Northern European countries (approximately two times).

### Sensitivity analysis

The calculations using the city specific RR coefficients yielded a different proportion and number of estimated RHAs than the ones using the two meta-coefficients, as expected. However, the relative changes in the number of hospital admissions attributed to heat between the two time-periods were not affected by the change of the RR coefficients.

## DISCUSSION

The analysis estimates that the number of RHAs will increase in a warmer climate with more hot days. Heat-related RHAs were projected to increase two- to three-fold in the future due to climate change. However, the proportion of respiratory admissions attributed to heat would remain rather small. This projection is in line with the results of a recent study that estimates respiratory

1  
2  
3 admissions due to excessive heat in New York State will increase 2-6 times from the period 1991-  
4  
5 2004 to the period 2080-2099.<sup>33</sup>  
6  
7

8 As most heat-related health outcomes occur during the warmest period of the year, presenting the  
9  
10 increase as a change in the proportion of the total number of annual RHAs can underestimate the  
11  
12 additional burden on the health care system during summer. As the threshold was exceeded for  
13  
14 approximately 40 days in one year, an annual increase of 0.21% would result in a 1.9% increase on  
15  
16 average during these 40 days. The annual numbers are used because the available baseline rates of  
17  
18 RHAs are expressed as an annual average. Applying results to sub-national scales could be  
19  
20 inappropriate because national averages summarize over considerable heterogeneity.  
21  
22

23  
24 The results suggest a larger impact from heat in Southern Europe in the future period, centred on  
25  
26 year 2035, than in the eastern and northern parts. This is in line with many climate change  
27  
28 projections showing a larger relative increase in the number of extremely hot days in southern  
29  
30 Europe compared with northern Europe.<sup>14</sup> However, to some extent this might also be explained by  
31  
32 model bias for northern Europe introduced by the RCA3 model, where the model appears to  
33  
34 underestimate temperature for the warmest days.<sup>19</sup> This temperature bias is present in the reference  
35  
36 period, future period, and threshold values; therefore, the estimated numbers of RHAs from the two  
37  
38 periods within each scenario are comparable, but comparisons within the same time-period, across  
39  
40 scenarios may be inaccurate.  
41  
42

43  
44 As the estimates are based on the population size in each grid cell, the added burden will be larger in  
45  
46 countries with larger increases in temperatures in densely populated areas. Because the population  
47  
48 of a city is considered a good predictor of the size of the urban heat island,<sup>34</sup> an increase in the  
49  
50 population living in urban areas will increase the numbers exposed and the temperature to which  
51  
52 they are exposed. Heat islands increase temperatures in urbanized areas compared to surrounding  
53  
54 areas, also reducing cooling during the night time.<sup>35</sup> These factors combined are likely to magnify the  
55  
56 health burden during a heatwave.<sup>36</sup> The spatial scale of the climate models makes them unable to  
57  
58  
59  
60

1  
2  
3 take the urban heat island effect into account. Together with the urbanization of Europe, this could  
4  
5 potentially result in underestimation of actual consequences/RHAs in the future period because the  
6  
7 same population size and composition were assumed in both periods. In addition, climate change is  
8  
9 likely to increase ozone concentrations that would add an additional health burden for people at risk  
10  
11 of respiratory diseases. The number of deaths and RHAs, due to a change in ozone, is expected to  
12  
13 change in the future.<sup>37</sup> A sensitivity analysis in the PHEWE study however showed that the exposure-  
14  
15 response relationship for heat did not substantially differ between models taking ozone into account  
16  
17 and models adjusting for NO<sub>2</sub> alone.<sup>3</sup>

18  
19  
20 We used the same thresholds for the reference and future period to isolate the effect of climate  
21  
22 change. This would tend to overestimate the increased impact because there will undoubtedly be  
23  
24 biological and/or social adaptations that will reduce future health temperature-related burdens.  
25  
26 However, given the uncertainty of such adaptation effects, we choose to not incorporate such effects  
27  
28 in the projections. Recent studies in the U.S indicate heat-related health burdens have decreased,<sup>38</sup>  
29  
30 indicating that some adaptation is taking place. An opposite trend appears to be occurring in  
31  
32 Stockholm, with an increase of the risk of mortality associated with heat during the 1990s.<sup>39</sup> A study  
33  
34 looking at the impact of heat on mortality, before and after the implementation of a heat warning  
35  
36 system, in Italy shows that the effects of extreme heat can be reduced while the effects of moderate  
37  
38 increased average temperatures remains similar.<sup>40</sup> The magnitude and the extent of future  
39  
40 adaptation is, of course, highly uncertain, and will vary between and within countries. Nevertheless,  
41  
42 cities with higher thresholds seem to have higher risk ratio coefficients.<sup>3 41</sup> In an effort to estimate  
43  
44 future and presumably higher thresholds, one must also adjust the risk ratio coefficients. This would  
45  
46 result in fewer days of elevated risk, but the risk increase on each occasion could be higher due to  
47  
48 the higher RRs.

49  
50  
51  
52  
53  
54 Table 2 shows how the results vary by global climate models and greenhouse gas scenarios. This  
55  
56 study exemplifies the magnitude of the difference between projections made by a model with  
57  
58  
59  
60

1  
2  
3 different initial conditions and between different models with the same initial conditions. The results  
4  
5 indicate the range of these estimates is large. The mean increase over the five projections however,  
6  
7 provides confidence that the number of RHAs will increase over Europe as the climate continues to  
8  
9 change. The results from the different greenhouse gas emission scenarios are somewhat inconsistent  
10  
11 with what is expected based on the characteristics of the scenarios. The scenario A2, which is  
12  
13 considered a high emission scenario, shows lower estimates of the increase in RHAs than the A1B  
14  
15 scenario, which is considered a middle of the road scenario. This result is from the different regional  
16  
17 climate models rather than the emission scenarios themselves. Up until 2050, the estimated  
18  
19 temperature increase is actually estimated to be higher in A1B than A2 according to IPCC.  
20  
21

22  
23 To improve the estimates of the impacts of heat on RHAs, detailed data on emergency room visits  
24  
25 and admissions during summer are needed, such as the proportion of emergency department cases  
26  
27 admitted to hospital, and the fatality rate. A better understanding of vulnerable groups is needed,  
28  
29 including how these groups could change over time. For example, the portion of the population aged  
30  
31 over 65 will increase from 17 to 29%<sup>42</sup> by 2050, significantly increasing the size of this vulnerable  
32  
33 group. COPD is mainly a disease of the elderly. Persons suffering from COPD appear especially  
34  
35 vulnerable to heat<sup>43</sup> and the incidence of COPD is likely to increase<sup>44</sup> with the consequence that the  
36  
37 health impacts of heat may increase in future years. This study was limited to estimating the impacts  
38  
39 on the total population because few age-specific relationships were reported and because age-  
40  
41 stratified data were only available on a coarser spatial scale than the climate data, which would  
42  
43 reduce the benefits of having spatial climate data. When spatial population data, such as the  
44  
45 Eurostat data, have a finer age-stratification, a more detailed assessment will be possible.  
46  
47

48  
49 Normal weather patterns in the future will be different than those of today, both for average  
50  
51 temperature and extreme weather events. As the number of heat related RHAs are expected to  
52  
53 increase on the sub-continental scale, additional national or regional projections of the future health  
54  
55 burden from heat are needed, taking into account possible changes in exposure and vulnerability.  
56  
57  
58  
59  
60

## CONCLUSIONS

Projected changes in temperature and the number of extreme heat events with climate change could substantially influence respiratory morbidity across Europe. Analyses projected that both the future proportion of annual RHAs attributed to heat and the relative change in heat related RHAs will be largest in Southern Europe, where they are expected to nearly triple. Eastern Europe can expect the smallest increase in heat-related RHAs, where they are estimated to approximately double. For all of Europe, the number of respiratory heat-related hospital admissions is projected to be 26,000 annually in the future period (2021–2050) compared with 11,000 in the reference period (1981–2010). The estimates presented rely on the assumption that no additional adaptation occurs. Future studies should elaborate and quantify the possible effects of different adaptation assumptions applied to regional conditions.

This work was supported by the EU-funded Climate-Trap project (contract EAHC 20081108) and by the Swedish Environmental Protection Agency through the research programme CLEO – Climate Change and Environmental Objectives. We would also like to acknowledge Estonia's Ministry of Education for providing resources to H. Orru with the grant SF0180060s09.

Contribution statement: CÅ, BF, HO has planned and designed the study. GS represented SMHI and provided climate data. CÅ ran the analyses, drafted the first manuscript and is guarantor. All authors have participated in the interpretation of results and revised the manuscript.

The specific estimates for each of the EU27 countries, for each of the climate projections is available after contact with corresponding author.

## REFERENCES

1. Loddenkemper R, Gibson G, Sibille Y. European lung white book. *European Respiratory Society/European Lung Foundation, Sheffield, UK, ERSJ* 2003;1-182.
2. Ayres JG, Forsberg B, Annesi-Maesano I, et al. Climate change and respiratory disease: European Respiratory Society position statement. *Eur Respir J* 2009;34(2):295-302.
3. Michelozzi P, Accetta G, De Sario M, et al. High temperature and hospitalizations for cardiovascular and respiratory causes in 12 European cities. *Am J Respir Crit Care Med* 2009;179(5):383-9.
4. Rocklöv J, Forsberg B. Comparing approaches for studying the effects of climate extremes - a case study of hospital admissions in Sweden during an extremely warm summer. *Glob Health Action* 2009;2.
5. Kovats RS, Hajat S. Heat stress and public health: a critical review. *Annu Rev Public Health* 2008;29:41-55.
6. Knowlton K, Rotkin-Ellman M, King G, et al. The 2006 California heat wave: impacts on hospitalizations and emergency department visits. *Environ Health Perspect* 2009;117(1):61-7.
7. Rey G, Jouglé E, Fouillet A, et al. The impact of major heat waves on all-cause and cause-specific mortality in France from 1971 to 2003. *Int Arch Occup Environ Health* 2007;80(7):615-26.
8. Lin S, Luo M, Walker RJ, et al. Extreme high temperatures and hospital admissions for respiratory and cardiovascular diseases. *Epidemiology* 2009;20(5):738-46.
9. Forsberg B, Braback L, Keune H, et al. An expert assessment on climate change and health - with a European focus on lungs and allergies. *Environ Health* 2012;11 Suppl 1:S4.
10. Ye X, Wolff R, Yu W, et al. Ambient Temperature and Morbidity: A Review of Epidemiological Evidence. *Environ Health Perspect* 2011.
11. Semenza JC, McCullough JE, Flanders WD, et al. Excess hospital admissions during the July 1995 heat wave in Chicago. *Am J Prev Med* 1999;16(4):269-77.
12. Dhainaut JF, Claessens YE, Ginsburg C, et al. Unprecedented heat-related deaths during the 2003 heat wave in Paris: consequences on emergency departments. *Crit Care* 2004;8(1):1-2.
13. IPCC. *Climate Change 2007 - The Physical Science Basis: Working Group I Contribution to the Fourth Assessment Report of the IPCC*. Cambridge, UK and New York, NY, USA: Cambridge University Press, 2007.
14. Nikulin G, Kjellström E, Hansson ULF, et al. Evaluation and future projections of temperature, precipitation and wind extremes over Europe in an ensemble of regional climate simulations. *Tellus A* 2011;63(1):41-55.
15. Schar C, Vidale PL, Luthi D, et al. The role of increasing temperature variability in European summer heatwaves. *Nature* 2004;427(6972):332-6.
16. Stott PA, Stone DA, Allen MR. Human contribution to the European heatwave of 2003. *Nature* 2004;432(7017):610-4.
17. Rebetez M, Dupont O, Giroud M. An analysis of the July 2006 heatwave extent in Europe compared to the record year of 2003. *Theoretical and Applied Climatology* 2009;95(1):1-7.
18. Barriopedro D, Fischer EM, Luterbacher J, et al. The Hot Summer of 2010: Redrawing the Temperature Record Map of Europe. *Science* 2011.
19. Samuelsson P, Jones CG, Willen U, et al. The Rossby Centre Regional Climate model RCA3: model description and performance. *Tellus Series a-Dynamic Meteorology and Oceanography* 2011;63(1):4-23.
20. Collins WD, Bitz CM, Blackmon ML, et al. The Community Climate System Model version 3 (CCSM3). *J Climate* 2006;19(11):2122-43.
21. Roeckner E, Bäuml G, Bonaventura L, et al. The atmospheric general circulation model ECHAM 5. PART I: Model description. Hamburg, Germany: MPI für Meteorologie, 2003.
22. Johns TC, Durman CF, Banks HT, et al. The new Hadley Centre Climate Model (HadGEM1): Evaluation of coupled simulations. *J Climate* 2006;19(7):1327-53.



23. Roeckner E, Arpe K, Bengtsson, et al. The atmospheric general circulation model {ECHAM}-4: {M}odel description and simulation of present-day climate, 1996:103-23.
24. Nakicenovic N, Alcamo J, Davis G, et al. Special report on emissions scenarios: a special report of Working Group III of the Intergovernmental Panel on Climate Change: Pacific Northwest National Laboratory, Richland, WA (US), Environmental Molecular Sciences Laboratory (US), 2000.
25. Ballester J, Robine JM, Herrmann FR, et al. Long-term projections and acclimatization scenarios of temperature-related mortality in Europe. *Nat Commun* 2011;2:358.
26. Knowlton K, Lynn B, Goldberg RA, et al. Projecting heat-related mortality impacts under a changing climate in the New York City region. *American Journal of Public Health* 2007;97(11):2028-34.
27. Baccini M, Kosatsky T, Analitis A, et al. Impact of heat on mortality in 15 European cities: attributable deaths under different weather scenarios. *J Epidemiol Community Health* 2011;65(1):64-70.
28. Beguin A, Hales S, Rocklov J, et al. The opposing effects of climate change and socio-economic development on the global distribution of malaria. *Global Environmental Change-Human and Policy Dimensions* 2011;21(4):1209-14.
29. Goldewijk KK, Beusen A, Janssen P. Long-term dynamic modeling of global population and built-up area in a spatially explicit way: HYDE 3.1. *Holocene* 2010;20(4):565-73.
30. Lawrence MG. The Relationship between Relative Humidity and the Dewpoint Temperature in Moist Air: A Simple Conversion and Applications. *Bulletin of the American Meteorological Society* 2005;86(2):225-33.
31. Parsons KC. *Human thermal environments: the effects of hot, moderate, and cold environments on human health, comfort, and performance*: Taylor & Francis, 2003.
32. Steadman RG. A Universal Scale of Apparent Temperature. *J Clim Appl Meteorol* 1984;23(12):1674-87.
33. Lin S, Hsu WH, Van Zutphen AR, et al. Excessive heat and respiratory hospitalizations in new york state: estimating current and future public health burden related to climate change. *Environ Health Perspect* 2012;120(11):1571-7.
34. Oke TR. City size and the urban heat island. *Atmospheric Environment (1967)* 1973;7(8):769-79.
35. Holmer B, Thorsson S, Eliasson I. COOLING RATES, SKY VIEW FACTORS AND THE DEVELOPMENT OF INTRA - URBAN AIR TEMPERATURE DIFFERENCES. *Geografiska Annaler: Series A, Physical Geography* 2007;89(4):237-48.
36. Nicholls N, Skinner C, Loughnan M, et al. A simple heat alert system for Melbourne, Australia. *Int J Biometeorol* 2008;52(5):375-84.
37. Orru H, Andersson C, Ebi KL, et al. Impact of climate change on ozone related mortality and morbidity in Europe. *Eur Respir J* 2012 Jun 27. [Epub ahead of print].
38. Davis RE, Knappenberger PC, Michaels PJ, et al. Changing heat-related mortality in the United States. *Environmental Health Perspectives* 2003;111(14):1712-18.
39. Rocklov J, Forsberg B, Meister K. Winter mortality modifies the heat-mortality association the following summer. *Eur Respir J* 2009;33(2):245-51.
40. Schifano P, Leone M, De Sario M, et al. Changes in the effects of heat on mortality among the elderly from 1998-2010: results from a multicenter time series study in Italy. *Environmental Health* 2012;11(1):58.
41. Baccini M, Biggeri A, Accetta G, et al. Heat effects on mortality in 15 European cities. *Epidemiology* 2008;19(5):711-9.
42. Giannakouris K. Ageing characterises the demographic perspectives of the European societies. *Statistics in focus* 2008;72:2008.
43. Schwartz J. Who is sensitive to extremes of temperature? A case-only analysis. *Epidemiology* 2005;16(1):67-72.
44. Mannino DM, Buist AS. Global burden of COPD: risk factors, prevalence, and future trends. *Lancet* 2007;370(9589):765-73.



1  
2  
3 **Figure 1. The range of the absolute increase in RHAs attributed to heat between the two**  
4 **periods (1981-2010, 2021-2050) as proportion the annual expected number of RHAs for each of the**  
5 **27 countries. The points show the highest and lowest estimate from four climate models under**  
6 **two emission scenarios.**  
7  
8  
9  
10  
11  
12  
13  
14  
15  
16  
17  
18  
19  
20  
21  
22  
23  
24  
25  
26  
27  
28  
29  
30  
31  
32  
33  
34  
35  
36  
37  
38  
39  
40  
41  
42  
43  
44  
45  
46  
47  
48  
49  
50  
51  
52  
53  
54  
55  
56  
57  
58  
59  
60

For peer review only

# Heat related respiratory hospital admissions in Europe in a changing climate

## Authors:

Christofer Åström<sup>1\*</sup>, Hans Orru<sup>1,2</sup>, Joacim Rocklöv<sup>1,3</sup>, Gustav Strandberg<sup>4</sup>, Kristie L. Ebi<sup>5</sup>, Bertil Forsberg<sup>1</sup>

## Affiliations:

<sup>1</sup> Department of Public Health and Clinical Medicine, Occupational and Environmental Medicine, Umeå University, Umeå, Sweden; <sup>2</sup> Department of Public Health, University of Tartu, Tartu, Estonia; <sup>3</sup> Department of Public Health and Clinical Medicine, Epidemiology and Global Health, Umeå University, Umeå, Sweden; <sup>4</sup> Swedish Meteorological and Hydrological Institute, Norrköping, Sweden; <sup>5</sup> ClimAdapt, Stanford University, Los Altos, California, USA

## Corresponding author:

\* Author to whom correspondence should be addressed:

Christofer Åström,

Occupational and Environmental Medicine, Department of Public Health and Clinical Medicine, Umeå University, SE 901 87, Sweden

+4690 785 0874

[christofer.astrom@envmed.umu.se](mailto:christofer.astrom@envmed.umu.se)

**Keywords:** Climate change, respiratory health, public health, heat

**Word count:** ~~3045~~3246

## ARTICLE SUMMARY

## Article focus

To assess how heat-related respiratory hospital admissions in Europe ~~are expected to~~could change with ~~the global warming~~increasing temperatures in the near future. ~~With~~Within a range of climate change projections, explore ~~the range of the~~ different impact estimates.

## Key messages

The 30-year mean annual increase in heat-related respiratory hospital admissions ~~related to heat~~ between the periods 1981-2010 and 2021-2050 can be counted in the 10's of thousands ~~because of projected temperature increases~~. The increase will be different in different parts of Europe with the largest relative increase in Southern Europe.

## Strengths and limitations

The study takes the spatial variation in ~~both~~ climate and population density into account in ~~the~~ impact calculations. ~~This makes,~~ making the estimates valid for countries with large national differences in ~~population densities and climate~~these factors.

The study results ~~exemplifies~~exemplify some the variation of ~~the~~ impacts ~~depending on~~under different climate change scenarios, as well as the variations within one ~~climate~~ scenario depending on the underlying climate model.

The use of ~~real~~ spatial population data ~~has~~ limited the study to ~~explore~~exploring the change in all age respiratory hospital ~~admissions without demographic trends~~. ~~The fact that the elderly is a well-known risk group when~~for studying heat-related illness, combined with the future ~~rise of~~increase in the proportion of elderly people ~~in the population may suggest that,~~ suggests the estimated impacts are ~~rather~~likely to be conservative

## ABSTRACT

Respiratory diseases are ranked second in Europe in terms of mortality, prevalence, and costs.

Studies have shown that extreme heat has a large impact on mortality and morbidity, with a large relative increase for respiratory diseases. Expected increases in mean temperature and the number of extreme heat events over the coming decades due to climate change raise questions about the possible health impacts.

Heat-related respiratory hospital admissions under a changing climate are projected using multi-city epidemiologic exposure-response relationships applied to gridded population data and country-specific baseline respiratory hospital admission rates. Times-series of temperatures are simulated with a regional climate model based on four global climate models, under two greenhouse gas emission scenarios (A1B & A2).

Between a reference period (1981–2010) and a future period (2021–2050), the total number of respiratory hospital admissions attributed to heat is projected to be larger in Southern Europe, with three-times more heat attributed respiratory hospital admissions in the future period. The smallest change was estimated in Eastern Europe with about a two-fold increase. For all of Europe, the number of respiratory heat-related hospital admissions is projected to be 26,000 annually in the future period compared with 11,000 in the reference period.

The results suggest that projected effects of climate change on temperature and the number of extreme heat events could substantially influence respiratory morbidity across Europe.

## INTRODUCTION

Respiratory diseases are ranked second in Europe in terms of mortality, prevalence, and costs.<sup>1</sup> This burden is expected to increase, partly due to a changing climate.<sup>2</sup> An environmental factor with a large impact on mortality and morbidity in Europe is extreme heat, with large effects on respiratory diseases.<sup>3-5</sup> Physiological effects of exposure to heat can be directly heat-related (heat stroke, heat fatigue and dehydration) or can contribute to worsening of respiratory and cardiovascular diseases, electrolyte disorders, and kidney problems.<sup>4-7</sup> The reasons for an increase in respiratory admissions may be several. Elderly with respiratory diseases such as COPD are less fit and suffer often from circulatory problems. Heat influenced admissions due to chronic airway obstruction and asthma increased more than admissions due to chronic bronchitis in a study from New York City,<sup>8</sup> but the daily number of admissions seldom allow a study of specific diagnoses. In a recent expert elicitation amongst European researchers engaged in environmental medicine or respiratory health, extreme heat stood out as most important climate-related pathway to adverse impacts on respiratory health, more important than changes in air pollutants and allergens.<sup>9</sup> A review found that heatwaves have a stronger relative impact on mortality than on emergency room visits and hospital admissions, suggesting that many individuals die before they can get to the hospital.<sup>10</sup> However, several studies confirm that heat also affects health care utilisation.<sup>3, 11</sup> During the heatwave of 2003 in France, the Assistance Public Hôpitaux de Paris recorded 2,400 additional visits to the emergency care units and 1,900 additional hospital admissions.<sup>12</sup> During the heatwave in California in 2006 there were almost 1,200 hospital admissions together with more than 16,000 visits to the emergency departments.<sup>6</sup>

It is possible that hospital admissions could increase in the future due to temperature changes projected with climate change, assuming no additional acclimatisation. Projected changes include an increase in global mean temperature of 1.8°C to 4.0°C by the end of this century, with larger increases over land areas at high latitudes, changing seasonal temperatures, and increases in the frequency, intensity, duration, and spatial extent of heatwaves.<sup>13</sup> Recent projections for 2070–2100

1  
2  
3 suggest that maximum temperatures experienced once every 20 years during the period 1961–1990  
4  
5 could be expected as often as every year in southern Europe and every 3rd-5th year in northern  
6  
7 Europe.<sup>14</sup> This means that Europe should expect an increase in both mean temperatures and the  
8  
9 number of extreme heat events. Recent heatwaves are consistent with projections. For example, the  
10  
11 heatwave that occurred in Europe 2003 could be expected to return every 46,000 years, based on  
12  
13 the temperature distribution for the years 1864–2000.<sup>15</sup> However, such extreme hot conditions may  
14  
15 become much more common in the end of this century due to anthropogenic climate changes.<sup>16</sup> The  
16  
17 uncertainty in this estimated return time is quite high, with a lower bound of the 90% confidence  
18  
19 interval of 9,000 years. Even so, another heatwave occurred in 2006 with the most anomalous July  
20  
21 temperature ever measured in Europe.<sup>17</sup> In 2010, Eastern Europe experienced a heatwave with  
22  
23 summer temperatures higher than the last 140 years, resulting in roughly 55,000 excess deaths in  
24  
25 Russia.<sup>18</sup>

26  
27  
28  
29  
30 The possible impacts of these changes on morbidity, particularly respiratory health, are relatively  
31  
32 unexplored.

### 33 34 35 **Aim**

36  
37 The aim of this study is to assess the extent to which changes in the frequency of hot days due to  
38  
39 climate change over the next 40 years could affect heat related respiratory hospital admissions  
40  
41 (RHAs) in Europe. Using a range of climate projections, we estimate the change in hospital  
42  
43 admissions between a reference period and a future period.

## 44 45 46 47 **METHODS**

### 48 49 50 **Climate change and temperature modelling**

51  
52 The Rossby Centre regional atmospheric climate model RCA3<sup>19</sup> was developed by SMHI (Swedish  
53  
54 meteorological and hydrological institute) to dynamically downscale results from the global climate  
55  
56 models CCSM3<sup>20</sup>, ECHAM5<sup>21</sup>, HadleyCM3<sup>22</sup> and ECHAM4<sup>23</sup> to a higher resolution over Europe. RCA3 is  
57  
58  
59  
60

1  
2  
3 run on a horizontal grid spacing of 0.44° (corresponding to approximately 50 km) and a time step of  
4  
5 30 minutes. Projections are based on the global greenhouse gas emission scenarios A1B and A2  
6  
7 (scenarios are described in detail in the SRES<sup>24</sup>). Both have been used in climate change health  
8  
9 impact assessments (HIA).<sup>25-28</sup> A1B is a “middle of the road” scenario and A2 is considered a high  
10  
11 emission scenario, although recent greenhouse gas emissions have been higher. Data from one  
12  
13 climate model, under one climate change scenario, is referred to as one climate change projection.  
14  
15

16  
17 We use aggregated daily projections of maximum temperature and relative humidity data to  
18  
19 estimate exposure for the periods 1981–2020 (reference period) and 2021–2050 (future period).  
20  
21

## 22 **Population and morbidity rates**

23  
24 The annual country specific rate of ~~respiratory hospital admissions~~ RHAs (ICD-9:460–519) between  
25  
26 2005 and 2010 were extracted from the WHO’s European Health for All Database  
27  
28 (<http://data.euro.who.int/hfadb>) for the EU27 countries. In the dataset, national hospital admissions  
29  
30 data are provided by national public health institutes, health ministries or corresponding functions.  
31  
32 The ICD-9 codes were preferred because the epidemiological studies in the PHEWE study were based  
33  
34 on ICD-9 RHAs. The mean value over the six years was used as a baseline morbidity rate. In order to  
35  
36 have a fine spatial resolution, official population data were from the HYDE theme within the  
37  
38 Netherlands Environmental Assessment Agency.<sup>29</sup> These data are gridded on a 0.0833° resolution  
39  
40 (approximately 9,45km) and matched with the climatic data by summing the population within each  
41  
42 climatic grid cell.  
43  
44  
45

## 46 **Exposure-response assumption**

47  
48 The impact calculations were based on the relationship between heat and RHAs (ICD-9:460–519)  
49  
50 estimated within the European PHEWE (Assessment and Prevention of Acute Health Effects of  
51  
52 Weather Conditions in Europe) project.<sup>3</sup> This relationship was based on analyses of 12 European  
53  
54 cities over the 1990s, using the daily maximum of apparent temperature (AT), where AT is a  
55  
56 combination of the measured temperature and the dew point temperature:  
57  
58  
59  
60

$$AT = -2.653 + 0.944 * T + 0.0153 * (DT)^2$$

where T is the air temperature and DP the dew point temperature, which can be derived from temperature and relative humidity.<sup>30</sup> The AT accounts for heat stress related not only to the absolute temperature but also to the saturation of the surrounding air that makes it harder to regulate body temperature by sweating, the most important mechanism to maintain a healthy body temperature.<sup>31</sup>

<sup>32</sup> The PHEWE model also included potential confounders such as air pollution, holidays, week days etc. The study used a 0–3 day lag of the maximum AT and concluded that the 90th percentile of this exposure variable for the summer months, April to September, is the appropriate threshold value for the heat-morbidity function.<sup>3</sup> We calculated the 90th percentile for the summer months for each grid cell from the climate data for the 1990s, yielding individual thresholds for each grid cell for each climate projection.

The PHEWE study calculated the relative risk (RR) coefficients for each of the 12 cities and then combined these into two meta-coefficients, for North-Continental cities 1.012 (95% CI 1.001–1.022) and Mediterranean cities 1.021 (95% CI 1.006–1.036), associated with a 1-degree increase above the temperature threshold. Meta-coefficients were more suitable as they allowed calculation of the change in RHAs for countries with and without a city in the PHEWE Study. We assigned the Mediterranean coefficient to Portugal and the Mediterranean countries. The rest of Europe was assigned the RR for the North continental cities. Statistically significant coefficients were found for all ages and ageages 75+ in the PHEWE study. Because the population data were not stratified by age, we used the PHEWE study coefficients for all ages.

## Projections

The final data used in the impact calculations were based on the climate data grid with a resolution of 0.44° resulting in 8,075 grid cells over Europe. The population data, RR coefficients and baseline morbidity rates were projected for each grid cell. The countries within EU27 were grouped into four



regions, Northern, Western, Eastern and Southern Europe, according to the United Nations classification scheme (<http://unstats.un.org/unsd/methods/m49/m49regin.htm#europe>).

Thus, each grid cell includes (1) a daily time-series of 0–3 day lag maximum AT for each climate change projection; (2) a grid cell specific temperature-morbidity threshold and a location-based RR coefficient; and (3) population. For each grid cell, the AT was compared to the specific threshold for each day in the two time periods and risk estimates were calculated for each day. The expected number of daily RHAs in each cell was calculated using the population and the expected daily number of RHAs per capita, based on the national average of the grid cell.

$$RHA_{i,t} = RR_i^{(AT_{i,t} - Thres_i)_+} * Pop_i * RHApc_i$$

where  $RHA_{i,t}$  is the number of RHAs attributable to heat in grid cell  $i$  at time  $t$ ,  $RR_i$  the RR coefficient in grid cell  $i$ ,  $(AT_{i,t} - Thres_i)_+$  the difference between the 0–3 lag AT and the threshold for grid cell  $i$  at time  $t$  if  $AT_{i,t}$  were greater than the threshold and 0 otherwise,  $Pop_i$  and  $RHApc_i$  the population and expected number RHAs per capita in grid cell  $i$ .

For each country, the estimated number of RHAs attributed to heat was calculated for each climate change projection, for both the reference and the future period. The estimated number of RHAs attributed to heat was then transformed into the proportion of the expected annual number RHAs for each country (data available from the authors). Mean estimates were calculated for each region for each climate change projection.

### Sensitivity analysis

Because the study results could heavily depend on the RR coefficients and thresholds used, we assess whether the estimates appeared sensitive to the region-specific meta-coefficients. We investigated the grids that contained the cities in the PHEWE study using both the location (Mediterranean or North-Continental) and city specific RR coefficients.<sup>3</sup> We then compared the results with respect to the attributed proportion of RHAs and the proportional change in heat related RHAs.

## RESULTS

The periods of warm days will increase in the future. For the cities included in the sensitivity analysis, the temperature threshold was exceeded annually, on average, by 20 days in the baseline period and 40 days in the future period, ~~on average each year~~.

In the future period, approximately 0.4% of the annual numbers of RHAs in Europe was estimated to be due to heat (Table 1), based on the mean estimates over the climate change projections. In absolute terms, assuming all else equal, this represents about 26,000 cases annually in Europe. This should be compared to the reference period where approximately 0.18% of all RHAs were attributed to heat or about 11,000 cases annually. Thus, the results suggest more than a relative doubling of the RHAs attributed to heat in Europe.

**Table 1.** The estimated proportion of RHAs attributed to heat for each region. Intervals describe the highest and lowest national estimate in each region

| Region          | 1981–2010             | 2021–2050             | Change                |
|-----------------|-----------------------|-----------------------|-----------------------|
| Eastern Europe  | 0.17% (0.16% – 0.19%) | 0.31% (0.29% – 0.35%) | 0.14% (0.11% – 0.17%) |
| Northern Europe | 0.13% (0.10% – 0.15%) | 0.27% (0.19% – 0.32%) | 0.14% (0.07% – 0.17%) |
| Southern Europe | 0.23% (0.18% – 0.26%) | 0.64% (0.42% – 0.68%) | 0.41% (0.23% – 0.44%) |
| Western Europe  | 0.18% (0.16% – 0.20%) | 0.39% (0.34% – 0.45%) | 0.21% (0.17% – 0.26%) |
| EU27            | 0.18% (0.10% – 0.26%) | 0.40% (0.19% – 0.68%) | 0.21% (0.07% – 0.44%) |

On the regional level, the five projections estimate increases in the number of heat-related RHAs for Europe (Table 2). However, in one climate change projection, The Czech Republic, Hungary, Poland and Slovakia were estimated to have a decrease in heat-related RHAs (Fig 1). The countries with the highest estimated increase also show the largest range between the highest and lowest estimate. The Scandinavian and Baltic countries show the smallest range between the highest and lowest estimates along with small increases of the mean estimates.

**Table 2.** Future increase in heat-related RHAs based on the four climate models, under two emission scenarios, as the percentage of the annual expected number of RHAs in each region

| Climate model                  | CCSM3      | ECHAM5 | HadCM3 | ECHAM4    | ECHAM5 |
|--------------------------------|------------|--------|--------|-----------|--------|
| <i>Greenhouse gas scenario</i> | <i>A1B</i> |        |        | <i>A2</i> |        |
| Eastern Europe                 | 0.32%      | 0.08%  | 0.18%  | 0.12%     | 0.01%  |
| Northern Europe                | 0.17%      | 0.09%  | 0.14%  | 0.20%     | 0.08%  |
| Southern Europe                | 0.51%      | 0.29%  | 0.64%  | 0.45%     | 0.14%  |
| Western Europe                 | 0.30%      | 0.11%  | 0.26%  | 0.29%     | 0.06%  |
| EU27                           | 0.32%      | 0.13%  | 0.29%  | 0.26%     | 0.07%  |

There is variation among countries, with the largest increases in the Southern European countries and the smallest increase in Eastern Europe (Table 2). The relative change in the burden of RHA's in relation to the climate change scenarios investigated indicate a larger relative increase in Mediterranean countries (approximately three times) compared to Northern European countries (approximately two times).

### Sensitivity analysis

The calculations using the city specific RR coefficients yielded a different proportion and number of estimated RHAs than the ones using the two meta-coefficients, as expected. However, the relative changes in the number of hospital admissions attributed to heat between the two time-periods were not affected by the change of the RR coefficients.

## DISCUSSION

The analysis estimates that the number of RHAs will increase in a warmer climate with more hot days. Heat-related RHAs were projected to increase two- to three-fold in the future due to climate change. However, the proportion of respiratory admissions attributed to heat would remain rather small. This projection is in line with the results of a recent study ~~which that~~ estimates ~~that the~~

1  
2  
3 respiratory admissions due to excessive heat in New York State will increase 2-6 times from the  
4  
5 period 1991-2004 to the period 2080-2099.<sup>33</sup>  
6  
7

8 | As most heat-related health outcomes occur during the warmest period of the year, presenting the  
9  
10 increase as a change in the proportion of the total number of annual RHAs can underestimate the  
11  
12 additional burden on the health care system during summer. As the threshold was exceeded for  
13  
14 approximately 40 days in one year, an annual increase of 0.21% would result in a 1.9% increase on  
15  
16 average during these 40 days. The annual numbers are used because the available baseline rates of  
17  
18 RHAs are expressed as an annual average. Applying results to sub-national scales could be  
19  
20 inappropriate because national averages summarize over considerable heterogeneity.  
21  
22

23  
24 The results suggest a larger impact from heat in Southern Europe in the future period, centred on  
25  
26 year 2035, than in the eastern and northern parts. This is in line with many climate change  
27  
28 projections showing a larger relative increase in the number of extremely hot days in southern  
29  
30 Europe compared with northern Europe.<sup>14</sup> However, to some extent this might also be explained by  
31  
32 model bias for northern Europe introduced by the RCA3 model, where the model appears to  
33  
34 underestimate temperature for the warmest days.<sup>19</sup> This temperature bias is present in the reference  
35  
36 period, future period, and threshold values; therefore, the estimated numbers of RHAs from the two  
37  
38 periods within each scenario are comparable, but comparisons within the same time-period, across  
39  
40 scenarios may be inaccurate.  
41  
42

43  
44 As the estimates are based on the population size in each grid cell, the added burden will be larger in  
45  
46 countries with larger increases in temperatures in densely populated areas. Because the population  
47  
48 of a city is considered a good predictor of the size of the urban heat island,<sup>34</sup> an increase in the  
49  
50 population living in urban areas will increase the numbers exposed and the temperature to which  
51  
52 they are exposed. Heat islands increase temperatures in urbanized areas compared to surrounding  
53  
54 areas, also reducing cooling during the night time.<sup>35</sup> These factors combined are likely to magnify the  
55  
56 health burden during a heatwave.<sup>36</sup> The coarse-spatial scale of the climate models makes them  
57  
58  
59  
60

1  
2  
3 unable to take the urban heat island effect into account. Together with the urbanization of Europe,  
4  
5 this could potentially result in underestimation of actual consequences/RHAs in the future period  
6  
7 because the same population size and composition were assumed in both periods. In addition,  
8  
9 climate change is likely to increase ozone concentrations that would add an additional health burden  
10  
11 for people at risk of respiratory diseases. The number of deaths and RHAs, due to a change in ozone,  
12  
13 is expected to change in the future.<sup>37</sup> A sensitivity analysis in the PHEWE study however showed that  
14  
15 the exposure-response relationship for heat did not substantially differ between models taking ozone  
16  
17 into account and models adjusting for NO<sub>2</sub> alone.<sup>3</sup>

18  
19  
20  
21 We used the same thresholds for the reference and future period to isolate the effect of climate  
22  
23 change. This would tend to overestimate the increased impact because there will undoubtedly be  
24  
25 biological and/or social adaptations that will reduce future health temperature-related burdens.  
26  
27 However, given the uncertainty of such adaptation effects, we choose to not incorporate such effects  
28  
29 in the projections. Recent studies in the U.S indicate heat-related health burdens have decreased,<sup>38</sup>  
30  
31 indicating that some adaptation is taking place. An opposite trend appears to be occurring in  
32  
33 Stockholm, with an increase of the risk of mortality associated with heat during the 1990s.<sup>39</sup> A study  
34  
35 looking at the impact of heat on mortality, before and after the implementation of a heat warning  
36  
37 system, in Italy shows that the effects of extreme heat can be reduced while the effects of moderate  
38  
39 increased average temperatures remains similar.<sup>40</sup> The magnitude and the extent of future  
40  
41 adaptation is, of course, highly uncertain, and will vary between and within countries. Nevertheless,  
42  
43 cities with higher thresholds seem to have higher risk ratio coefficients.<sup>3 41</sup> In an effort to estimate  
44  
45 future and presumably higher thresholds, one must also adjust the risk ratio coefficients. This would  
46  
47 result in fewer days of elevated risk, but the risk increase on each occasion could be higher due to  
48  
49 the higher RRs.  
50  
51  
52

53  
54 Table 12 shows how the results vary by global climate models and greenhouse gas scenarios. This  
55  
56 study exemplifies the magnitude of the difference between projections made by a model with  
57  
58  
59  
60

1  
2  
3 different initial conditions and between different models with the same initial conditions. The results  
4  
5 indicate the range of these estimates is large. The mean increase over the five projections however,  
6  
7 provides confidence that the number of RHAs will increase over Europe as the climate continues to  
8  
9 change. The results from the different greenhouse gas emission scenarios are somewhat inconsistent  
10  
11 with what is expected based on the characteristics of the scenarios. The scenario A2, which is  
12  
13 considered a high emission scenario, shows lower estimates of the increase in RHAs than the A1B  
14  
15 scenario, which is considered a middle of the road scenario. This result is from the different regional  
16  
17 climate models rather than the emission scenarios themselves. Up until 2050, the estimated  
18  
19 temperature increase is actually estimated to be higher in A1B than A2 according to IPCC.  
20  
21  
22

23 To improve the estimates of the impacts of heat on RHAs, detailed data on emergency room visits  
24  
25 and admissions during summer are needed, such as the proportion of emergency department cases  
26  
27 admitted to hospital, and the fatality rate. A better understanding of vulnerable groups is needed,  
28  
29 including how these groups could change over time. For example, the portion of the population aged  
30  
31 over 65 will increase from 17 to 29%<sup>42</sup> by 2050, significantly increasing the size of this vulnerable  
32  
33 group. COPD is mainly a disease of the elderly. Persons suffering from COPD appear especially  
34  
35 vulnerable to heat<sup>43</sup> and the incidence of COPD is likely to increase<sup>44</sup> with the consequence that the  
36  
37 health impacts of heat may increase in future years. This study was limited to estimating the impacts  
38  
39 on the total population because few age-specific relationships were reported and  
40  
41 because age-stratified data were only available on a coarser spatial scale than the climate data,  
42  
43 which would reduce the benefits of having spatial climate data. When spatial population data, such  
44  
45 as the Eurostat data, have a finer age-stratification, a more detailed assessment will be possible.  
46  
47  
48  
49

50 Normal weather patterns in the future will be different than those of today, both for average  
51  
52 temperature and extreme weather events. As the number of heat related RHAs are expected to  
53  
54 increase on the sub-continental scale, additional national or regional projections of the future health  
55  
56 burden from heat are needed, taking into account possible changes in exposure and vulnerability.  
57  
58  
59  
60

## CONCLUSIONS

Projected changes in temperature and the number of extreme heat events with climate change could substantially influence respiratory morbidity across Europe. Analyses projected that both the future proportion of annual RHAs attributed to heat and the relative change in heat related RHAs will be largest in Southern Europe, where they are expected to nearly triple. Eastern Europe can expect the smallest increase in heat-related RHAs, where they are estimated to approximately double. For all of Europe, the number of respiratory heat-related hospital admissions is projected to be 26,000 annually in the future period (2021–2050) compared with 11,000 in the reference period (1981–2010). The estimates presented rely on the assumption that no additional adaptation occurs. Future studies should elaborate and quantify the possible effects of different adaptation assumptions applied to regional conditions.

This work was supported by the EU-funded Climate-Trap project (contract EAHC 20081108) and by the Swedish Environmental Protection Agency through the research programme CLEO – Climate Change and Environmental Objectives. We would also like to acknowledge Estonia's Ministry of Education for providing resources to H. Orru with the grant SF0180060s09.

Contribution statement: CÅ, BF, HO has planned and designed the study. GS represented SMHI and provided climate data. CÅ ran the analyses, drafted the first manuscript and is guarantor. All authors have participated in the interpretation of results and revised the manuscript.

The specific estimates for each of the EU27 countries, for each of the climate projections is available after contact with corresponding author.

## REFERENCES

1. Loddenkemper R, Gibson G, Sibille Y. European lung white book. *European Respiratory Society/European Lung Foundation, Sheffield, UK, ERSJ* 2003;1-182.
2. Ayres JG, Forsberg B, Annesi-Maesano I, et al. Climate change and respiratory disease: European Respiratory Society position statement. *Eur Respir J* 2009;34(2):295-302.
3. Michelozzi P, Accetta G, De Sario M, et al. High temperature and hospitalizations for cardiovascular and respiratory causes in 12 European cities. *Am J Respir Crit Care Med* 2009;179(5):383-9.
4. Rocklöv J, Forsberg B. Comparing approaches for studying the effects of climate extremes - a case study of hospital admissions in Sweden during an extremely warm summer. *Glob Health Action* 2009;2.
5. Kovats RS, Hajat S. Heat stress and public health: a critical review. *Annu Rev Public Health* 2008;29:41-55.
6. Knowlton K, Rotkin-Ellman M, King G, et al. The 2006 California heat wave: impacts on hospitalizations and emergency department visits. *Environ Health Perspect* 2009;117(1):61-7.
7. Rey G, Jouglé E, Fouillet A, et al. The impact of major heat waves on all-cause and cause-specific mortality in France from 1971 to 2003. *Int Arch Occup Environ Health* 2007;80(7):615-26.
8. Lin S, Luo M, Walker RJ, et al. Extreme high temperatures and hospital admissions for respiratory and cardiovascular diseases. *Epidemiology* 2009;20(5):738-46.
9. Forsberg B, Braback L, Keune H, et al. An expert assessment on climate change and health - with a European focus on lungs and allergies. *Environ Health* 2012;11 Suppl 1:S4.
10. Ye X, Wolff R, Yu W, et al. Ambient Temperature and Morbidity: A Review of Epidemiological Evidence. *Environ Health Perspect* 2011.
11. Semenza JC, McCullough JE, Flanders WD, et al. Excess hospital admissions during the July 1995 heat wave in Chicago. *Am J Prev Med* 1999;16(4):269-77.
12. Dhainaut JF, Claessens YE, Ginsburg C, et al. Unprecedented heat-related deaths during the 2003 heat wave in Paris: consequences on emergency departments. *Crit Care* 2004;8(1):1-2.
13. IPCC. *Climate Change 2007 - The Physical Science Basis: Working Group I Contribution to the Fourth Assessment Report of the IPCC*. Cambridge, UK and New York, NY, USA: Cambridge University Press, 2007.
14. Nikulin G, Kjellström E, Hansson ULF, et al. Evaluation and future projections of temperature, precipitation and wind extremes over Europe in an ensemble of regional climate simulations. *Tellus A* 2011;63(1):41-55.
15. Schar C, Vidale PL, Luthi D, et al. The role of increasing temperature variability in European summer heatwaves. *Nature* 2004;427(6972):332-6.
16. Stott PA, Stone DA, Allen MR. Human contribution to the European heatwave of 2003. *Nature* 2004;432(7017):610-4.
17. Rebetez M, Dupont O, Giroud M. An analysis of the July 2006 heatwave extent in Europe compared to the record year of 2003. *Theoretical and Applied Climatology* 2009;95(1):1-7.
18. Barriopedro D, Fischer EM, Luterbacher J, et al. The Hot Summer of 2010: Redrawing the Temperature Record Map of Europe. *Science* 2011.
19. Samuelsson P, Jones CG, Willen U, et al. The Rossby Centre Regional Climate model RCA3: model description and performance. *Tellus Series a-Dynamic Meteorology and Oceanography* 2011;63(1):4-23.
20. Collins WD, Bitz CM, Blackmon ML, et al. The Community Climate System Model version 3 (CCSM3). *J Climate* 2006;19(11):2122-43.
21. Roeckner E, Bäuml G, Bonaventura L, et al. The atmospheric general circulation model ECHAM 5. PART I: Model description. Hamburg, Germany: MPI für Meteorologie, 2003.
22. Johns TC, Durman CF, Banks HT, et al. The new Hadley Centre Climate Model (HadGEM1): Evaluation of coupled simulations. *J Climate* 2006;19(7):1327-53.



23. Roeckner E, Arpe K, Bengtsson, et al. The atmospheric general circulation model {ECHAM}-4: {M}odel description and simulation of present-day climate, 1996:103-23.
24. Nakicenovic N, Alcamo J, Davis G, et al. Special report on emissions scenarios: a special report of Working Group III of the Intergovernmental Panel on Climate Change: Pacific Northwest National Laboratory, Richland, WA (US), Environmental Molecular Sciences Laboratory (US), 2000.
25. Ballester J, Robine JM, Herrmann FR, et al. Long-term projections and acclimatization scenarios of temperature-related mortality in Europe. *Nat Commun* 2011;2:358.
26. Knowlton K, Lynn B, Goldberg RA, et al. Projecting heat-related mortality impacts under a changing climate in the New York City region. *American Journal of Public Health* 2007;97(11):2028-34.
27. Baccini M, Kosatsky T, Analitis A, et al. Impact of heat on mortality in 15 European cities: attributable deaths under different weather scenarios. *J Epidemiol Community Health* 2011;65(1):64-70.
28. Beguin A, Hales S, Rocklov J, et al. The opposing effects of climate change and socio-economic development on the global distribution of malaria. *Global Environmental Change-Human and Policy Dimensions* 2011;21(4):1209-14.
29. Goldewijk KK, Beusen A, Janssen P. Long-term dynamic modeling of global population and built-up area in a spatially explicit way: HYDE 3.1. *Holocene* 2010;20(4):565-73.
30. Lawrence MG. The Relationship between Relative Humidity and the Dewpoint Temperature in Moist Air: A Simple Conversion and Applications. *Bulletin of the American Meteorological Society* 2005;86(2):225-33.
31. Parsons KC. *Human thermal environments: the effects of hot, moderate, and cold environments on human health, comfort, and performance*: Taylor & Francis, 2003.
32. Steadman RG. A Universal Scale of Apparent Temperature. *J Clim Appl Meteorol* 1984;23(12):1674-87.
33. Lin S, Hsu WH, Van Zutphen AR, et al. Excessive heat and respiratory hospitalizations in new york state: estimating current and future public health burden related to climate change. *Environ Health Perspect* 2012;120(11):1571-7.
34. Oke TR. City size and the urban heat island. *Atmospheric Environment (1967)* 1973;7(8):769-79.
35. Holmer B, Thorsson S, Eliasson I. COOLING RATES, SKY VIEW FACTORS AND THE DEVELOPMENT OF INTRA - URBAN AIR TEMPERATURE DIFFERENCES. *Geografiska Annaler: Series A, Physical Geography* 2007;89(4):237-48.
36. Nicholls N, Skinner C, Loughnan M, et al. A simple heat alert system for Melbourne, Australia. *Int J Biometeorol* 2008;52(5):375-84.
37. Orru H, Andersson C, Ebi KL, et al. Impact of climate change on ozone related mortality and morbidity in Europe. *Eur Respir J* 2012 Jun 27. [Epub ahead of print].
38. Davis RE, Knappenberger PC, Michaels PJ, et al. Changing heat-related mortality in the United States. *Environmental Health Perspectives* 2003;111(14):1712-18.
39. Rocklov J, Forsberg B, Meister K. Winter mortality modifies the heat-mortality association the following summer. *Eur Respir J* 2009;33(2):245-51.
40. Schifano P, Leone M, De Sario M, et al. Changes in the effects of heat on mortality among the elderly from 1998-2010: results from a multicenter time series study in Italy. *Environmental Health* 2012;11(1):58.
41. Baccini M, Biggeri A, Accetta G, et al. Heat effects on mortality in 15 European cities. *Epidemiology* 2008;19(5):711-9.
42. Giannakouris K. Ageing characterises the demographic perspectives of the European societies. *Statistics in focus* 2008;72:2008.
43. Schwartz J. Who is sensitive to extremes of temperature? A case-only analysis. *Epidemiology* 2005;16(1):67-72.
44. Mannino DM, Buist AS. Global burden of COPD: risk factors, prevalence, and future trends. *Lancet* 2007;370(9589):765-73.

1  
2  
3 **Figure 1. The range of the absolute increase in RHAs attributed to heat between the two**  
4 **periods (1981-2010, 2021-2050) as proportion the annual expected number of RHAs for each of the**  
5 **27 countries. The points show the highest and lowest estimate from four climate models under**  
6 **two emission scenarios.**  
7  
8  
9  
10  
11  
12  
13  
14  
15  
16  
17  
18  
19  
20  
21  
22  
23  
24  
25  
26  
27  
28  
29  
30  
31  
32  
33  
34  
35  
36  
37  
38  
39  
40  
41  
42  
43  
44  
45  
46  
47  
48  
49  
50  
51  
52  
53  
54  
55  
56  
57  
58  
59  
60

1  
2  
3  
4  
5  
6  
7  
8  
9  
10  
11  
12  
13  
14  
15  
16  
17  
18  
19  
20  
21  
22  
23  
24  
25  
26  
27  
28  
29  
30  
31  
32  
33  
34  
35  
36  
37  
38  
39  
40  
41  
42  
43  
44  
45  
46  
47  
48  
49  
50  
51  
52  
53  
54  
55  
56  
57  
58  
59  
60

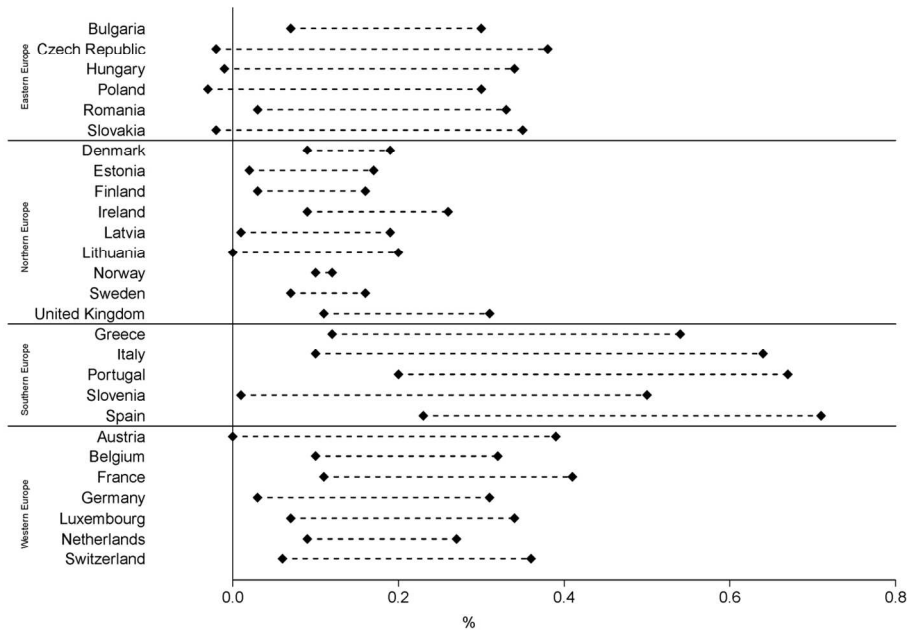

130x90mm (300 x 300 DPI)

view only
